# Supplementary material
Source: PubMed Central journal article supplement (PMC122878)
Supplement: pnas_99_9_5925__2.pdf [file pnas_99_9_5925__2.pdf]

A. wt/mt+ (CC125), vegetative cells, A strand

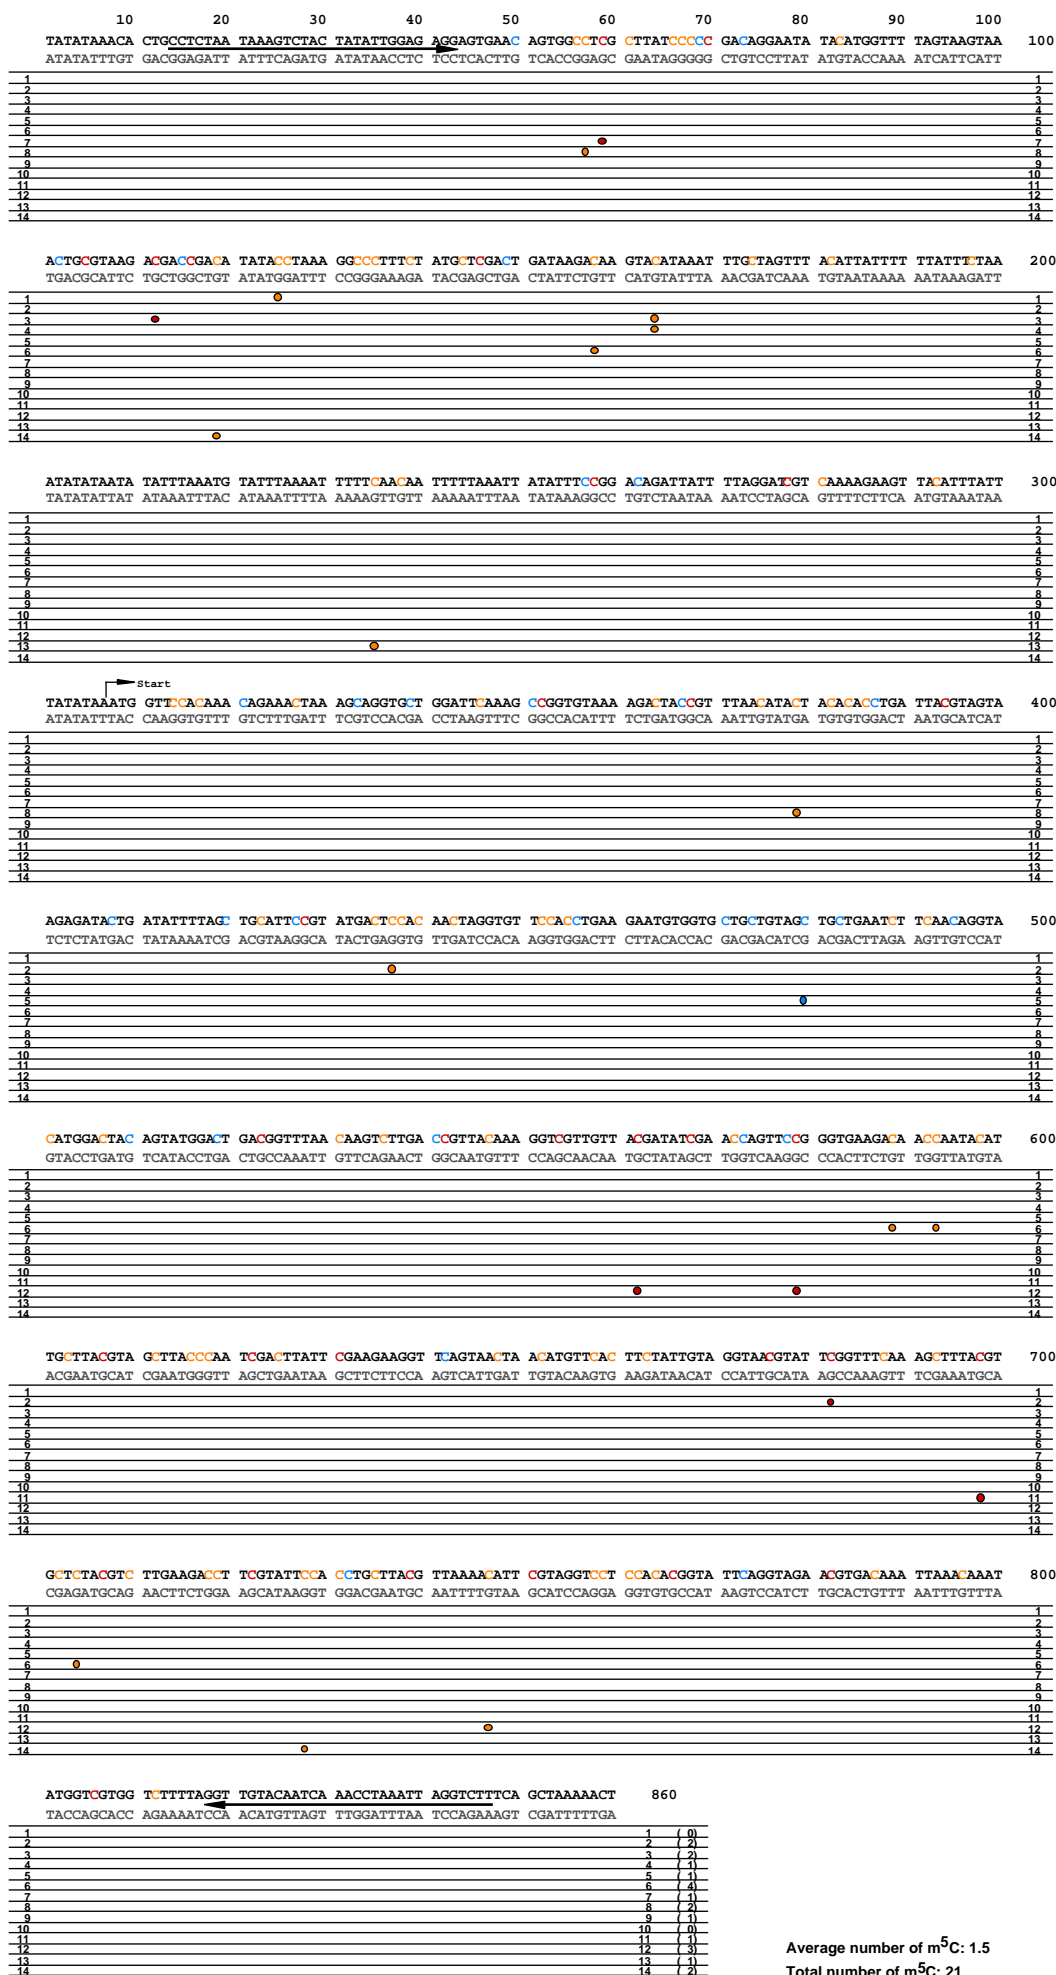

B. wt/mt+ (CC125), gametes, A strand

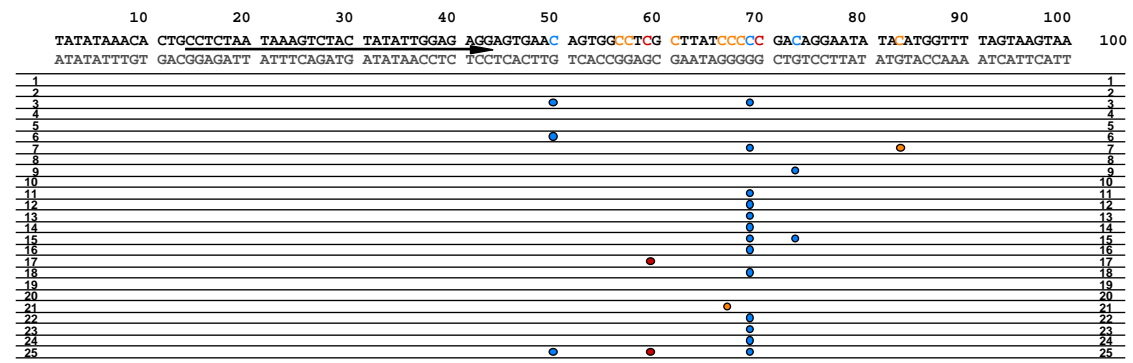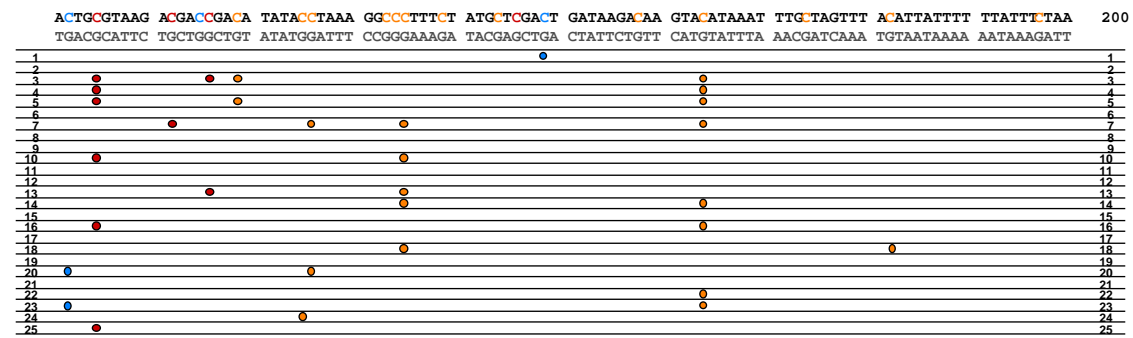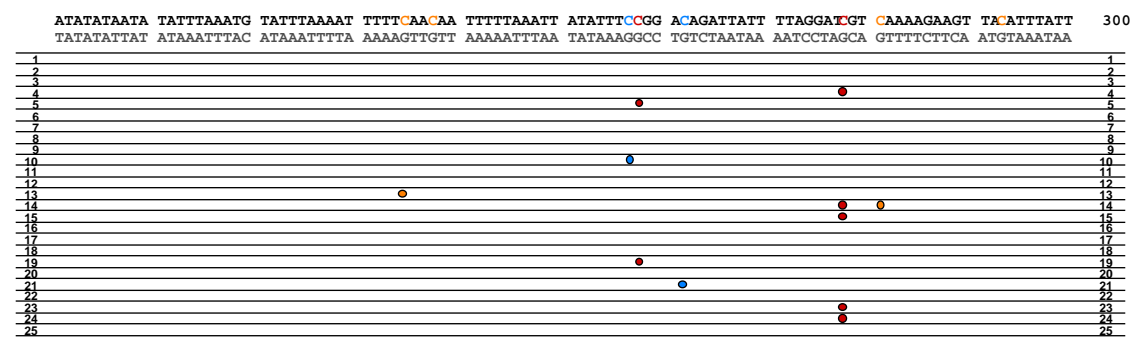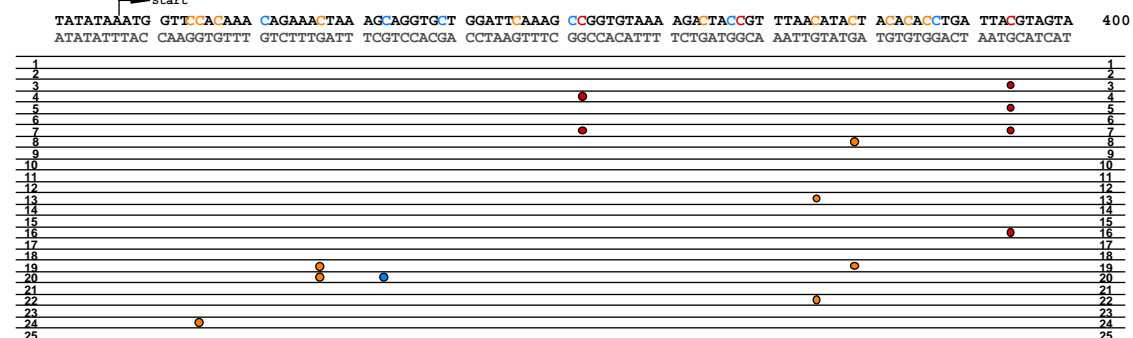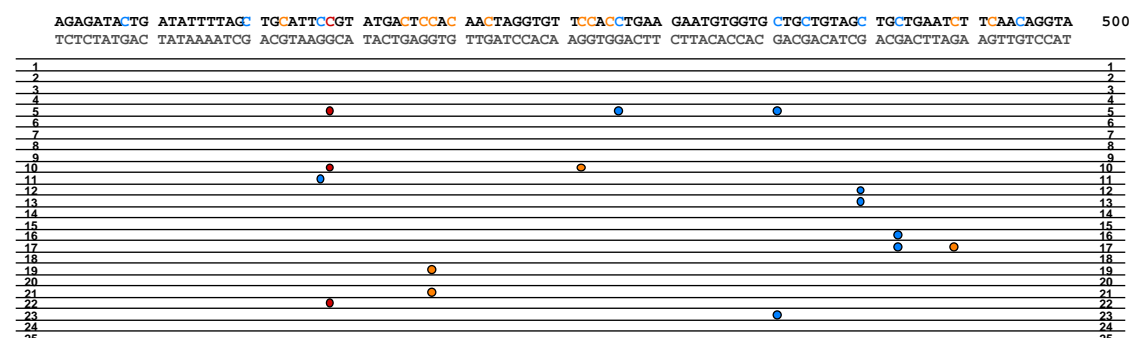



C. wt/mt- (CC124), vegetative cells, A strand

10 20 30 40 50 60 70 80 90 100  
TATATAAACA CTGCTCTAA TAAAGTCTAC TATATTGGAG AGGAGTGAAC AGTGGCTCG CTTATCCCCG GACAGGAATA TACATGGTTT TAGTAAGTAA 100  
ATATATTGT GACGGAGATT ATTCAGATG ATATAACCTC TCCTCACTTG TCACCGGAGC GAATAGGGGG CTGCTCTAT ATGTACCAA ATCATTCATT

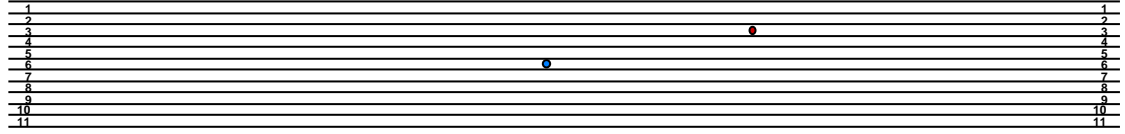

ACITGCGTAAG ACGACCGACA TATACCTAAA GGCCCTTTCT ATGCTCGACT GATAAGACAA GTACATAAAT TTGCTAGTTT AATTATTTT TTATTCTAA 200  
TGACGCATTG TGCTGCTGT ATATGGATT CCGGAAAGA TACGAGCTGA CTATTCTGTT CATGTATTTA AACGATCAA TGTAAATAAA AATAAAGATT

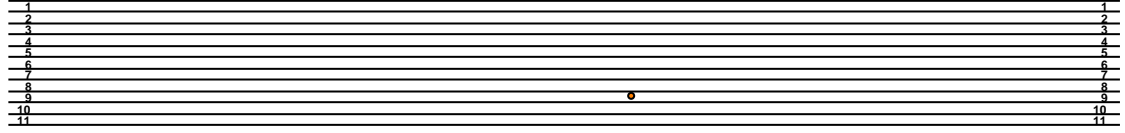

ATATATAATA TATTTAAATG TATTTAAAT TTTTCAACAA TTTTAAAT ATATTTCCGG ACAGATTATT TTAGGATCGT CAAAAGAAGT TACTTTATT 300  
TATATATTAT ATAAATTAC ATAAATTTA AAAAGTTGT AAAAATTTA TATAAAGCC TGTCTAATAA AATCCTAGCA GTTTCTTCA ATGTAAATA

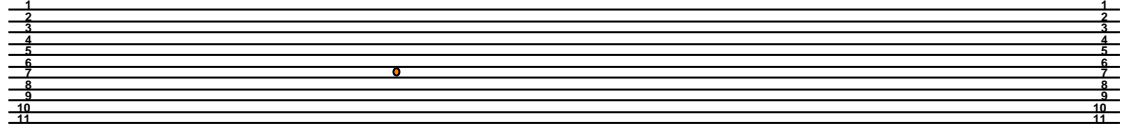

TATATAAATG GTTCCACAAA CAGAACTAA AGCAGGTGCT GGATTCAAG CCGGTGTAAA AGACTACCGT TTAACATACT ACACACCTGA TTACGTAGTA 400  
ATATATTAC CAAGGTGTTT GTCTTTGATT TCGTCCACGA CCTAAGTTT GGCACATT TCTGATGCA AATTGTATGA TGTGTGGACT AATGCATCAT

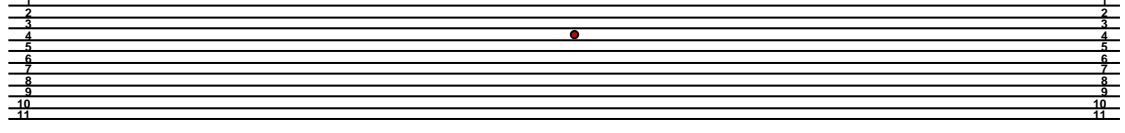

AGAGATACTG ATATTTTAC TGCACTCCGT ATGACTCCAC AACTAGGTGT TCCACCTGAA GAATGTGGTG CTGCTGTAGC TGCTGAATCT TCAACAGGTA 500  
TCTCTATGAC TATAAATCG ACGTAAGCA TACTGAGGTG TTGATCCACA AGGTGGACTT CTTACACCAC GACGACATCG ACGACTTAGA AGTTGTCCAT

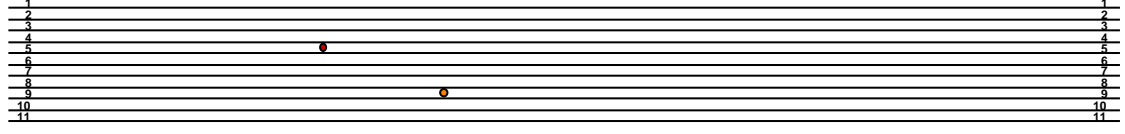

CAITGGACTAC AGTATGGACT GACGGTTTAA CAAGTTTGA CCGTTACAAA GGTCTGTGTT ACGATATCGA ACCAGTCCG GGTGAAGACA ACCAATCAT 600  
GTACCTGATG TCATACCTGA CTGCCAAAT GTTCAGAACT GGCAATGTTT CCAGCAACAA TGCTATAGCT TGGTCAAGGC CCACTTCTGT TGGTTATGTA

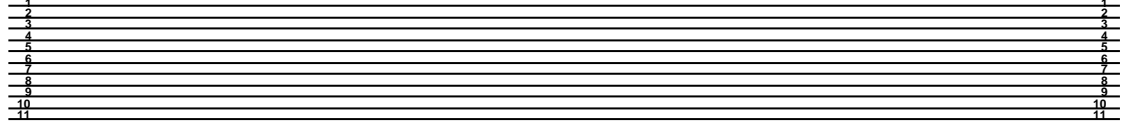

TGCTTACGTA GCTTACCCAA TCGACTTATT CGAAGAAGGT TTAGTAACTA ACATGTTAC TTCTATTGTA GGTAACGTAT TCGGTTTCAA AGCTTTACGT 700  
ACGAATGCAT CGAATGGTT AGCTGAATA GCTTCTTCCA AGTCATTGAT TGTACAAGTG AAGATAACAT CCATTGCATA AGCCAAAGTT TCGAAATGCA

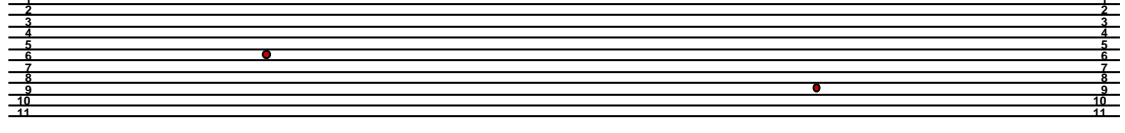

GCTCTACGTC TTGAAGCCT TCGTATTCCA CCTGCTTACG TTAAAAATT CGTAGGTCCT CCACACGGTA TTACGGTAGA ACGTGACAAA TTAACAAT 800  
CGAGATGCAG AACTTCTGGA AGCATAAGGT GGACGAATGC AATTTGTAA GCATCCAGGA GGTGTGCCAT AAGTCCATCT TGCCTGTTT AATTTGTTA

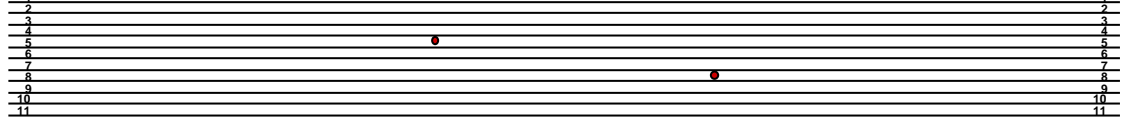

ATGGTCTGG TTTTGTAGT TGTACAATCA AACCTAAAT AGGTCTTTCA GCTAAAACT 860  
TACCAGCACC AGAAAATCCA ACATGTTAGT TTGATTAA TCCAGAAAGT CGATTTTGA

|    |    |     |
|----|----|-----|
| 1  | 1  | (0) |
| 2  | 2  | (0) |
| 3  | 3  | (1) |
| 4  | 4  | (1) |
| 5  | 5  | (2) |
| 6  | 6  | (2) |
| 7  | 7  | (1) |
| 8  | 8  | (1) |
| 9  | 9  | (3) |
| 10 | 10 | (0) |
| 11 | 11 | (0) |

Average number of m<sup>5</sup>C: 1.0  
Total number of m<sup>5</sup>C: 11

D. wt/mt- (CC124), gametes, A strand

10 20 30 40 50 60 70 80 90 100  
 TATATAACA CTGCCTCTAA TAAAGTCTAC TATATTGGAG AGGAGTGAAC AGTGGCCTCG CTTATCCCC GACAGGAATA TACATGGTTT TAGTAAGTAA 100  
 ATATATTGT GACGGAGATT ATTCAGATG ATATAACCTC TCCTCACTTG TCACCGGAGC GAATAGGGGG CTGTCTTAT ATGTACCAA ATCATTCAAT

ACTGCCAAG ACGACCGACA TATACCTAAA GGCCTTTCT ATGCTCGACT GATAAGACAA GTACATAAAT TTGTAGTTT ACATTATTTT TTATTETAA 200  
 TGACGCATTC TGCTGGCTGT ATATGGATT CCGGAAAGA TACGAGCTGA CTATTCTGTT CATGTATTTA AACGATCAA TGTAATAAAA AATAAAGATT

ATATATAATA TATTTAAATG TATTTAAAT TTTTCAACAA TTTTAAAT ATATTCCGG ACAGATTATT TTAGGATCT CAAAAGAAGT TACATTTATT 300  
 TATATATTAT ATAAATTTAC ATAAATTTTA AAAAGTTGTT AAAAATTTAA TATAAAGGCC TGTCTAATAA AATCCTAGCA GTTTTCTCA ATGTAATAA

Start  
 TATATAAATG GTTCCACAAA CAGAACTAA AGCAGGTGT GGATTCAAAG CCGGTGTAAA AGACTACCGT TTAACATACT ACACACCTGA TTACGTAGTA 400  
 ATATATTAC CAAGGTGTTT GTCTTTGATT TCGTCCACGA CCTAAGTTTC GGCCACATT TCTGATGGCA AATTGTATGA TGTGTGGACT AATGCATCAT

AGAGATACTG ATATTTTAC TGCATTCCGT ATGACTCCAC AACTAGGTGT TCCACCTGAA GAATGTGGTG CTGCTGTAGC TGCTGAATCT TCAACAGGTA 500  
 TCTCTATGAC TATAAATCG ACGTAAGGCA TACTGAGGTG TTGATCCACA AGGTGGACTT CTTACACCAC GACGACATCG ACGACTTAGA AGTTGTCCAT

CATGGACTAC AGTATGGACT GACGGTTTAA CAAGCTTGA CCGTTACAAA GGTCGTTGTT ACGATATCGA ACCAGTCCG GGTGAAGACA ACCAATACAT 600  
 GTACCTGATG TCATACCTGA CTGCCAATG GTTCAGAACT GGCAATGTTT CCAGCAACAA TGCTATAGCT TGGTCAAGGC CCACTTCTGT TGGTTATGTA

TGCTTACGTA GCTTACCCAA TCGACTTATT CGAAGAAGGT TTAGTAACTA ACATGTTTAC TTCTATTGTA GGTAACTGAT TCGGTTTCAA AGCTTTACGT 700  
 ACGAATGCAT CGAATGGGT AGCTGAATAA GCTTCTTCCA AGTCATTGAT TGTACAAGTG AAGATAACAT CCATTGCATA AGCCAAAGTT TCGAAATGCA

GCTCTACGTC TTGAAGACCT TCGTATTCCA CCGCTTACG TTA AAAAATT CGTAGGTCCT CCACACGGTA TTCAGGTAGA ACGTGACAAA TTA AAAAAT 800  
 CGAGATGCAG AACTTCTGGA AGCATAAGGT GGAAGAATGC AATTTTGTAA GCATCCAGGA GGTGTGCCAT AAGTCCATCT TGCCTGTTT AATTTGTTTA

ATGGTCGTTG TTTTTAGGT TGTACAATCA AACCTAAAT AGTCTTCCA GCTAAAAAT 860  
 TACCAGCACC AGAAAATCCA ACATGTTAGT TTGATTTAA TCCAGAAAGT CGATTTTGA

|    |    |     |
|----|----|-----|
| 1  | 1  | (1) |
| 2  | 2  | (0) |
| 3  | 3  | (2) |
| 4  | 4  | (0) |
| 5  | 5  | (1) |
| 6  | 6  | (0) |
| 7  | 7  | (1) |
| 8  | 8  | (0) |
| 9  | 9  | (1) |
| 10 | 10 | (0) |

Average number of m<sup>5</sup>C: 0.6  
 Total number of m<sup>5</sup>C: 6

E. me-1/mt+ (CC1154), vegetative cells, A strand

10 20 30 40 50 60 70 80 90 100  
TATATAACA CTGCCTCTAA TAAAGTCTAC TATATTGGAG AGGAGTGAA AGTGGCTCG CTTATCCCC GACAGGAATA TACATGGTTT TAGTAAGTAA 100  
ATATATTTGT GACGGAGATT ATTCAGATG ATATAACCTC TCCTCACTTG TCACCCGAGC GAATAGGGGG CTGTCCTTAT ATGTACCAA ATCATTTCAT

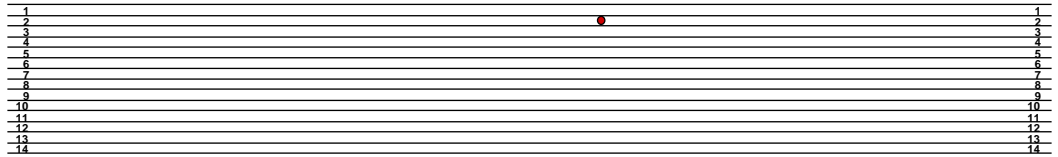

ACTGCGTAAG ACGACCGACA TATACTAAA GGCCCTTCT ATGCTCGACT GATAAGAAA GTACATAAAT TTG TAGTTT ACATTATTT TTATTCTAA 200  
TGACGCATTC TGCTGGCTGT ATATGGATT CCGGGAAGA TACGAGCTGA CTATTCTGTT CATGTATTA AACGATCAA TGTAAATAAA AATAAAGATT

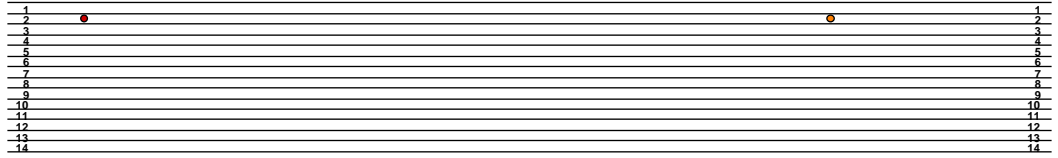

ATATATAATA TATTTAAATG TATTTAAAA TTTTCAACAA TTTTAAAT ATATTTCGG ACGATTATT TTAGGATGT CAAAAGAAGT TACATTTATT 300  
TATATATTAT ATAAATTTAC ATAAATTTTA AAAAGTTGTT AAAAATTTAA TATAAAGGCC TGTCTAATAA AATCCTAGCA GTTTTCTTCA ATGTAAATAA

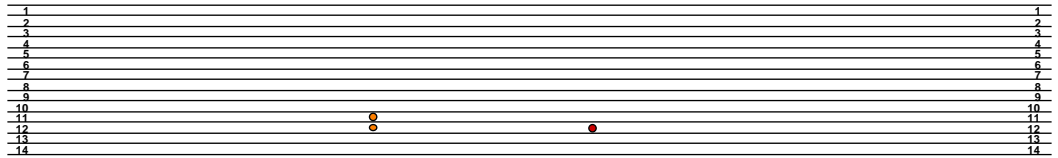

Start  
TATATAAATG GTTCCACAAA CAGAACTAA AGTAGGTCT GGATTCAAAG CCGGTGTAAA AGATACCGT TTAACATACT ACACACTGA TTACGTAGTA 400  
ATATATTTAC CAAGGTGTTT GTCCTTGATT TCGTCCACGA CCTAAGTTTC GGCCACATT TCTGATGCA AATTGTATGA TGTGTGACT AATGCATCAT

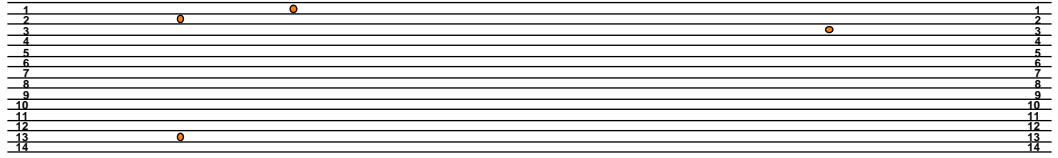

AGAGATACTG ATATTTTAGT TGCAATTCGT ATGACTCCAC AACTAGGTGT TCCACTGAA GAATGTGGTG CTGCTGTAGC TGCTGAATCT TCAACAGGTA 500  
TCTCTATGAC TATAAATCG ACGTAAGCA TACTGAGTG TTGATCCACA AGGTGGACTT CTTACACCAC GACGACATCG ACGACTTAGA AGTTGTCCAT

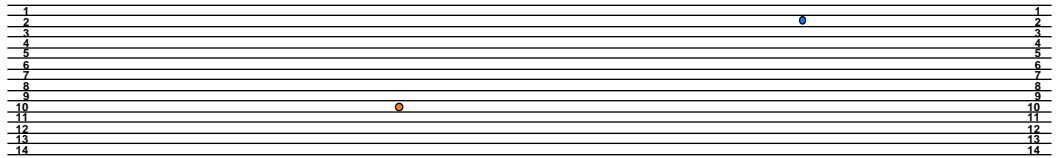

CAATGGATAC AGTATGGACT GACGGTTTAA CAAGCTTGA CCGTTACAAA GGTCGTTGTT ACGATATCGA ACCAGTTCGG GGTGAAGAA ACCAATACAT 600  
GTACCTGATG TCATACCTGA CTGCCAATT GTTCAGAACT GGCAATGTT CCAGCAACAA TGCTATAGCT TGGTCAAGC CCACCTTCTGT TGGTTATGTA

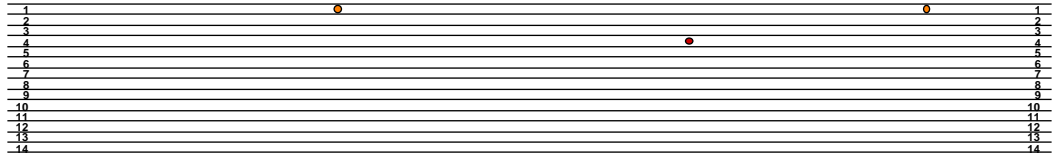

TGCTTACGTA GTTACCCAA TCGACTTATT CGAAGAAGGT TTAGTAAC TAATGTTAC TTCTATTGTA GGTAACGTAT TCGGTTTCAA AGCTTTACGT 700  
ACGAATGCAT CGAATGGGTT AGCTGAATA GCTTCTTCCA AGCATTGAT TGTACAAGTG AAGATAACAT CCATTGCATA AGCCAAAGTT TCGAAATGCA

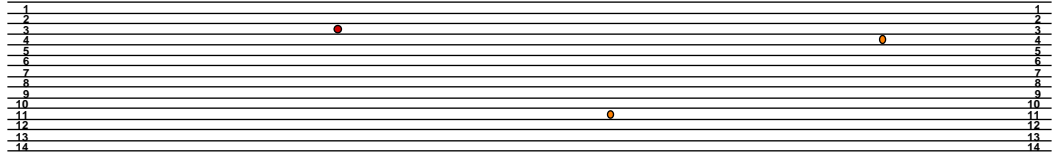

GCTCTACGTC TTGAAGACT TCGATTCCA CCGTTTAC TTAACAATT CGTAGTCTT CACACGGTA TTCAGGTAGA ACGTGAACA TTAACAAT 800  
CGAGATGCAG AACTTCTGGA AGCATAAGGT GGACGAATGC AATTTTGTAA GCATCCAGGA GGTGTGCCAT AAGTCCATCT TGCACTGTTT AATTTGTTA

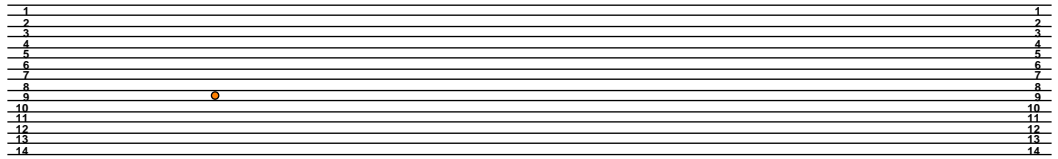

ATGGTCTGGG TCTTTTAGGT TGTACAATCA AACCTAAAT AGGCTTTTCA GCTAAAACT 860  
TACCAGCACC AGAAAATCCA ACATGTTAGT TTGATTTAA TCCAGAAAGT CGATTTTGA

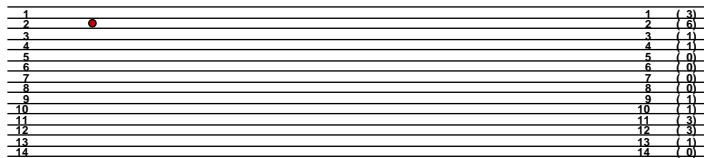

Average number of m<sup>5</sup>C: 1.4  
Total number of m<sup>5</sup>C: 20

F. me-1/mt+ (CC1154), gametes, A strand

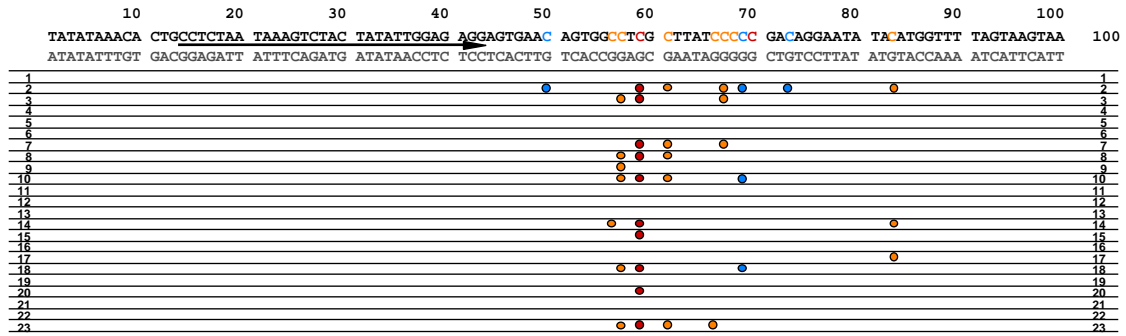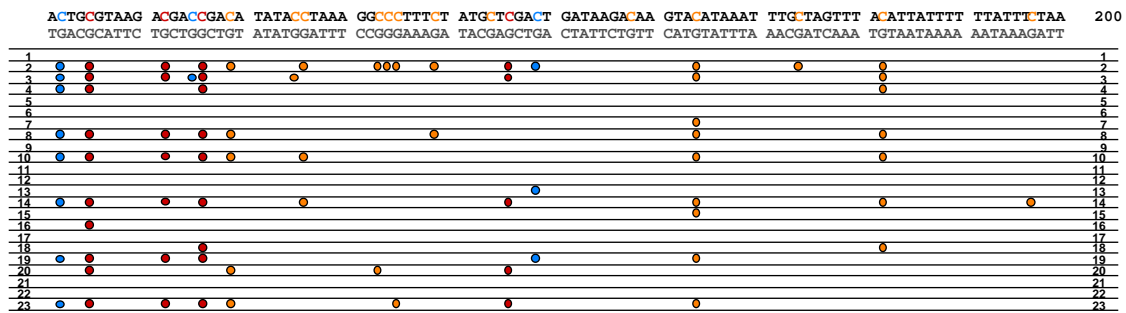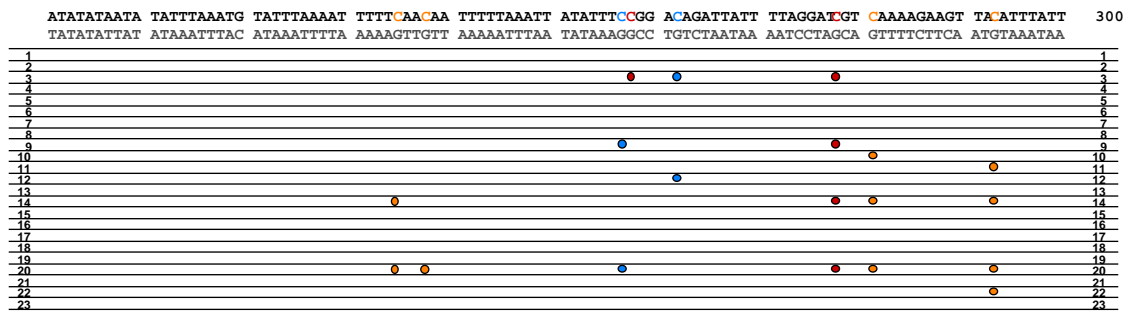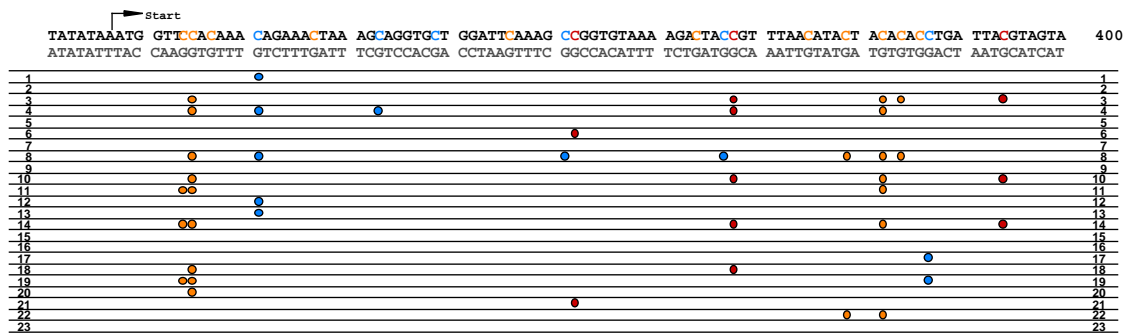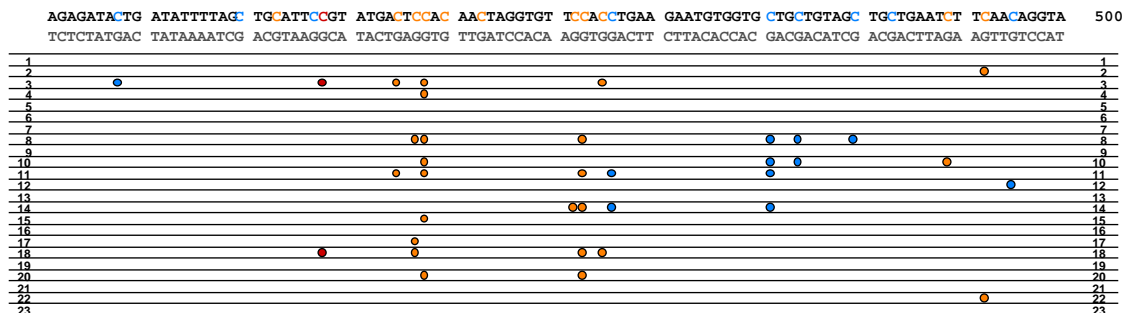

CATGGACTAC AGTATGGACT GACGGTTTAA CAAGTCTTGA CCGTTACAAA GGTCGGTTGTT ACGATATCGA ACCAGTTCCG GGTGAAGACA ACCAATACAT 600  
 GTACCTGATG TCATACCTGA CTGCCAAATT GTTCAGAACT GGCAATGTTT CCAGCAACAA TGCTATAGCT TGGTCAAGGC CCACCTCTGT TGGTTATGTA

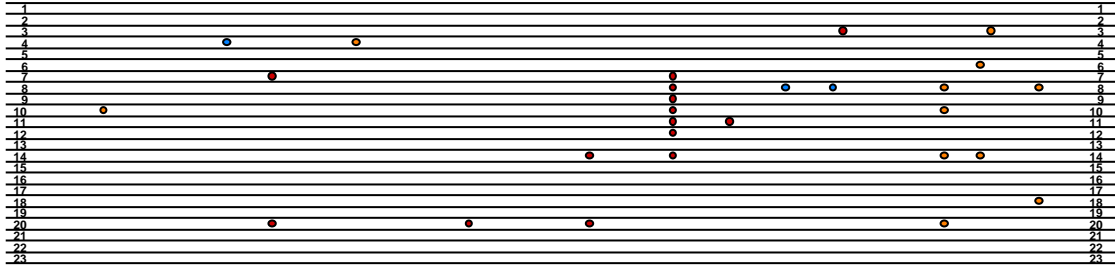

TGCTTACGTA GATTACCCAA TCGACTTATT CGAAGAAGGT TTAGTAACTA ACATGTTAC TTCTATTGTA GGTAACGTAT TCGGTTCCAA AGCTTTACGT 700  
 ACGAATGCAT CGAATGGGTT AGCTGAATAA GCTTCTTCCA AGTCATTGAT TGTACAAGTG AAGATAACAT CCATTGCATA AGCCAAAGTT TCGAAATGCA

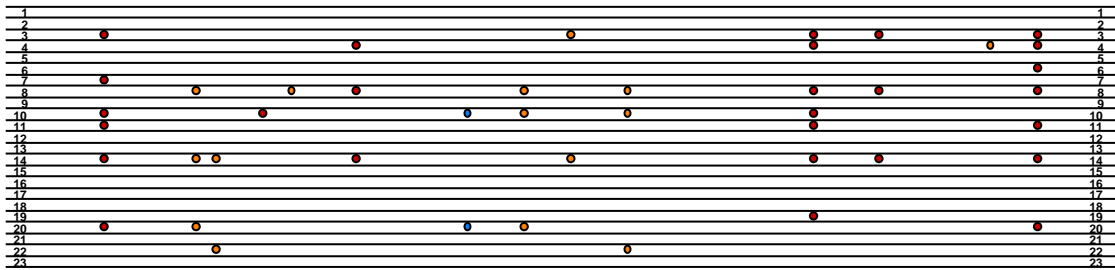

GCTCTACGTC TTGAAGACCT TCGATTCCAA CBTGCTTACG TTAAAACATT CGTAGGTCTT CCACACGGTA TTCAGGTAGA ACGTGACAAA TTAACAACAT 800  
 CGAGATGCAG AACTTCTGGA AGCATAAGGT GGACGAATGC AATTTTGTAA GCATCCAGGA GGTGTGCCAT AAGTCCATCT TGCACCTGTT AATTTGTTTA

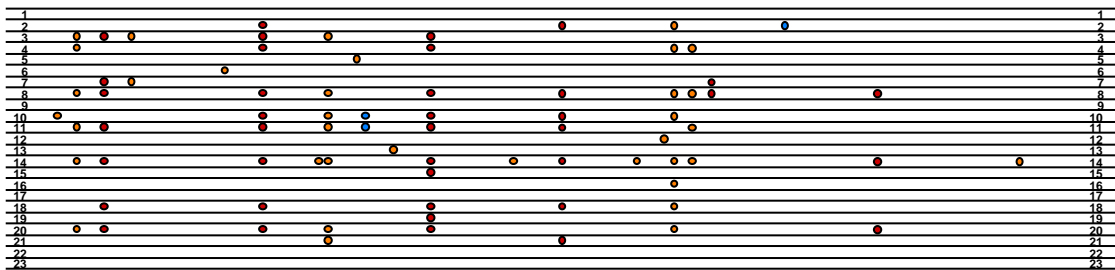

ATGGTCGGT TCTTTTAGGT TGTACAATCA AACCTAAATT AGTCTTTCA GCTAAAACT 860  
 TACCAGCACC AGAAAAATCA ACATGTTAGT TTGGATTAA TCCAGAAAGT CGATTTTGA

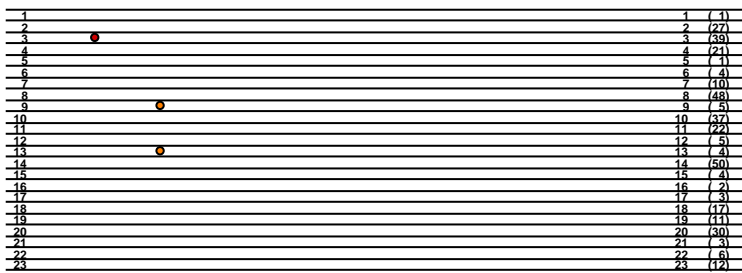

Average number of m<sup>5</sup>C: 15.7

m<sup>5</sup>C numbers  
 CpG : 139 (38.4 %)  
 CpNpG : 51 (14.1 %)  
 Others : 172 (47.5 %)  
 Total : 362



G. me-1/mt- (CC1155), vegetative cells, A strand

10 20 30 40 50 60 70 80 90 100 100  
TATATAACA CTGCCTCTAA TAAAGTCTAC TATATTGGAG AGGAGTGAAC AGTGGCCTCG CTTATCCCCC GACAGGAATA TAATGGTTT TAGTAAGTAA 100  
ATATATTGT GACGGAGATT ATTCAGATG ATATAACCTC TCCTCACTTG TCACCGGAGC GAATAGGGGG CTGTCCTTAT ATGTACCAAA ATCATTTCAT

1 1  
2 2  
3 3  
4 4  
5 5  
6 6  
7 7  
8 8  
9 9  
10 10  
11 11  
12 12

ACTGCCTAAG ACGACCGACA TATACCTAAA GGCCCTTTCT ATGCTCGACT GATAAGACAA GTACATAAAT TTG TAGTGT ACATTATTTT TTATTETAA 200  
TGACGCATTC TGCTGGCTGT ATATGGATT CCGGGAAGA TACGAGCTGA CTATTCTGTT CATGTATTTA AACGATCAAA TGTAATAAAA AATAAAGATT

1 1  
2 2  
3 3  
4 4  
5 5  
6 6  
7 7  
8 8  
9 9  
10 10  
11 11  
12 12

ATATATAATA TATTTAAATG TATTTAAAA TTTTCAACAA TTTTAAATT ATATTCCGG ACAGATTATT TTAGGATCGT CAAAAGAAGT TACATTTATT 300  
TATATATTAT ATAAATTTAC ATAAATTTTA AAAAGTTGTT AAAAATTTTA TATAAAGGCC TGCTAATAA AATCCTAGCA GTTTCTTCA ATGTAAATAA

1 1  
2 2  
3 3  
4 4  
5 5  
6 6  
7 7  
8 8  
9 9  
10 10  
11 11  
12 12

Start  
TATATAAATG GTTCCACAAA CAGAACTAA AGCAGGTGCT GGATTCAAAG CCGGTGTAAA AGACTACCGT TTAACTACT ACACACCTGA TTACGTAGTA 400  
ATATATTAC CAAGGTGTTT GTCTTTGATT TCGTCCACGA CCTAAGTTTC GGCCACATTT TCTGATGGCA AATTGTATGA TGTGTGGACT AATGCATCAT

1 1  
2 2  
3 3  
4 4  
5 5  
6 6  
7 7  
8 8  
9 9  
10 10  
11 11  
12 12

AGAGATACTG ATATTTTACG TGCAATTCGT ATGACTCCAC AACTAGGTGT TCCACCTGAA GAATGTGGTG CTGCTGTAGC TGCTGAATCT TCAACAGGTA 500  
TCTCTATGAC TATAAAATCG ACGTAAGGCA TACTGAGGTG TTGATCCACA AGGTGGACTT CTTACACCAC GACGACATCG ACGACTTAGA AGTTGTCCAT

1 1  
2 2  
3 3  
4 4  
5 5  
6 6  
7 7  
8 8  
9 9  
10 10  
11 11  
12 12

CATGGACTAC AGTATGGACT GACGGTTTAA CAAGTCTTGA CCGTTACAAA GGTCTGTGTT ACGATATCGA ACCAGTTCGG GGTGAAGACA ACCAATACAT 600  
GTACCTGATG TCATACCTGA CTGCCAAATT GTTCAGAACT GGCAATGTT CCAGCAACAA TGCTATAGCT TGGTCAAGGC CCACCTCTGT TGGTTATGTA

1 1  
2 2  
3 3  
4 4  
5 5  
6 6  
7 7  
8 8  
9 9  
10 10  
11 11  
12 12

TGCTTACGTA GTTTACCCAA TCGACTTATT CGAAGAAGGT TTAGTAACTA ACATGTTTAC TTCTATTGTA GGTAACGTAT TCGGTTTCAA AGCTTTACGT 700  
ACGAATGCAT CGAATGGGT AGCTGAATAA GCTTCTCCA AGTCATTGAT TGTACRAAGT AAGATAACAT CCATTGCATA AGCCAAAGTT TCGAAATGCA

1 1  
2 2  
3 3  
4 4  
5 5  
6 6  
7 7  
8 8  
9 9  
10 10  
11 11  
12 12

GCTCTACGTC TTGAAGCCT TCGTATTCCA CCGCTTACG TTAACAATT CGTAGGTCCT CCACACGGTA TTCAGGTAGA ACGTGACAAA TTAACAAT 800  
CGAGATGCAG AACTTCTGGA AGCATAAGGT GGACGAATGC AATTTGTAA GCATCCAGGA GGTGTGCCAT AAGTCCATCT TGCCTGTTT AATTTGTTTA

1 1  
2 2  
3 3  
4 4  
5 5  
6 6  
7 7  
8 8  
9 9  
10 10  
11 11  
12 12

ATGGTCGTGG TTTTTAGGT TGTACAATCA AACCTAAATT AGGTCTTCA GCTAAAACT 860  
TACCAGCACC AGAAAATCCA ACATGTTAGT TTGGATTTAA TCCAGAAAAT CGATTTTTGA

1 1 ( 1)  
2 2 ( 0)  
3 3 ( 0)  
4 4 ( 0)  
5 5 ( 1)  
6 6 ( 0)  
7 7 ( 0)  
8 8 ( 0)  
9 9 ( 0)  
10 10 ( 0)  
11 11 ( 1)  
12 12 ( 0)

Average number of m<sup>5</sup>C: 0.3  
Total number of m<sup>5</sup>C: 3

H. me-1/mt- (CC1155), gametes, A strand

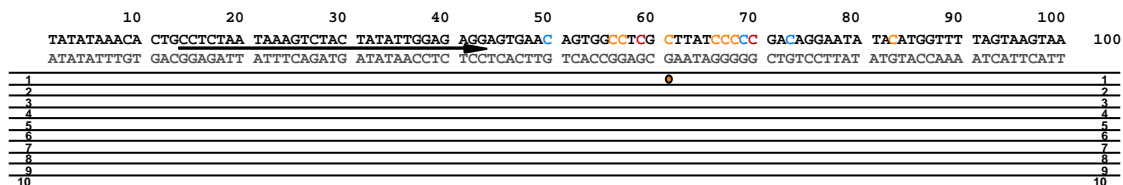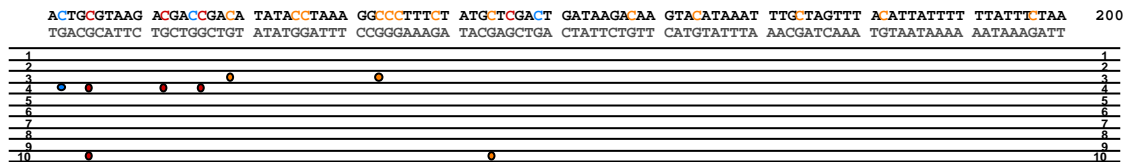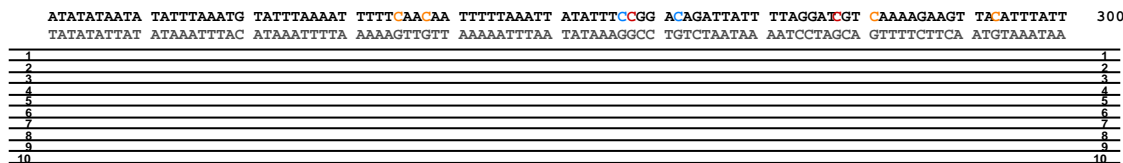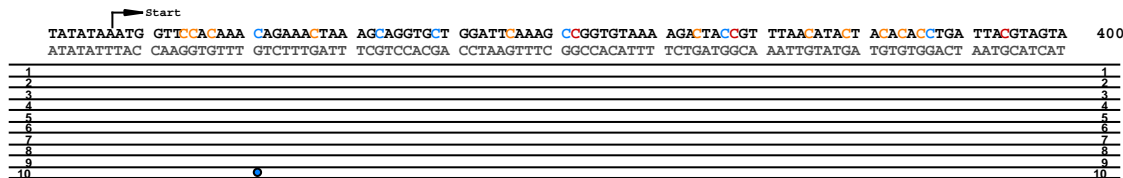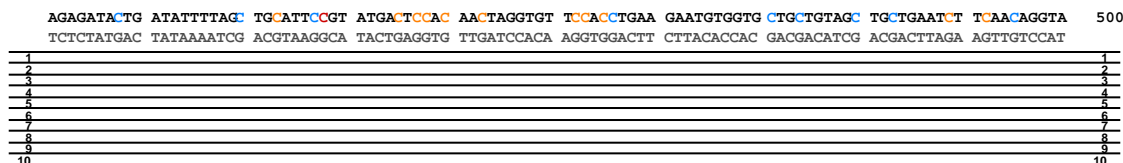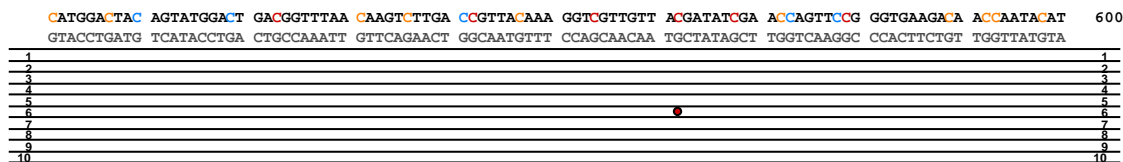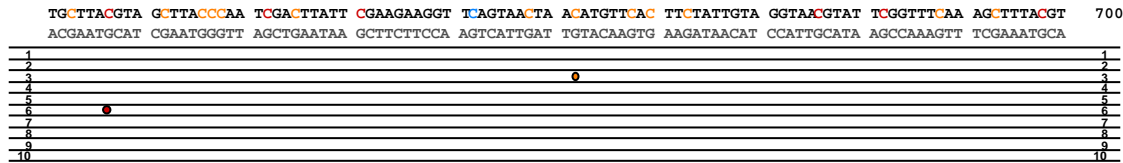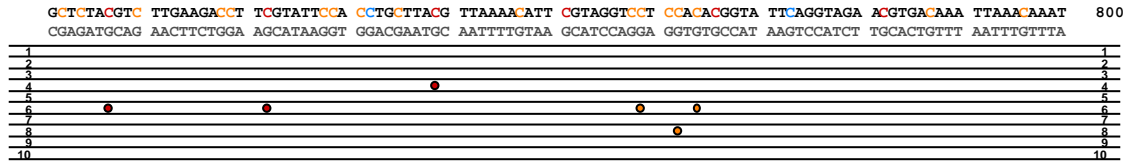

ATGGTCGTGG TCTTTTAGGT TGTACAATCA AACCTAAAT AGGCTTTTCA GCTAAAACT 860  
 TACCAGCACC AGAAAATCCA ACATGTTAGT TTGGATTFAA TCCAGAAAGT CGATTTTGA

|    |    |     |
|----|----|-----|
| 1  | 1  | (1) |
| 2  | 2  | (0) |
| 3  | 3  | (3) |
| 4  | 4  | (5) |
| 5  | 5  | (0) |
| 6  | 6  | (6) |
| 7  | 7  | (0) |
| 8  | 8  | (1) |
| 9  | 9  | (0) |
| 10 | 10 | (3) |

Average number of m<sup>5</sup>C: 1.9  
 Total number of m<sup>5</sup>C: 19

I. *mat-1/mt-* (CC1312), vegetative cells, A strand

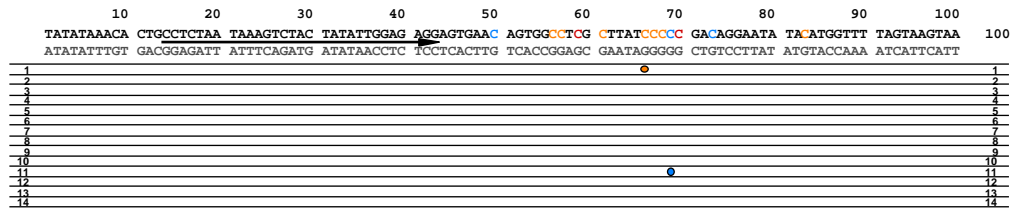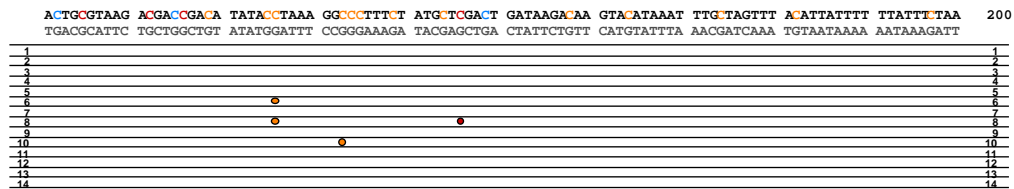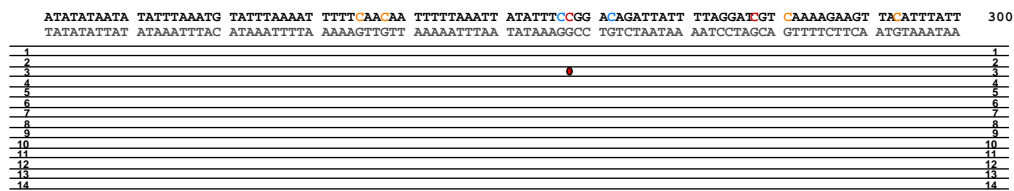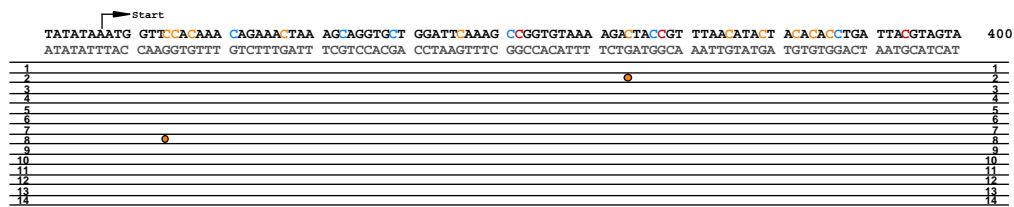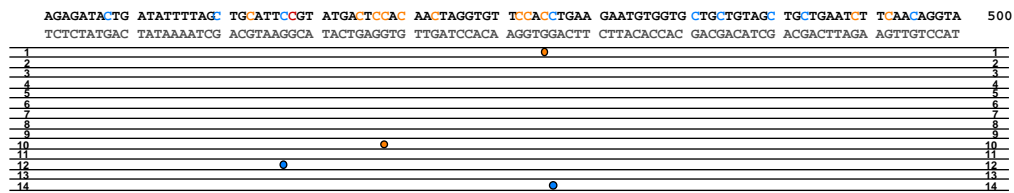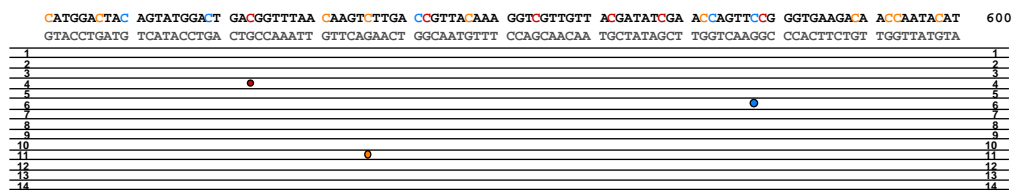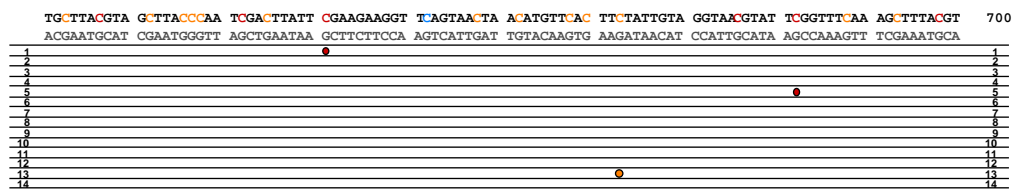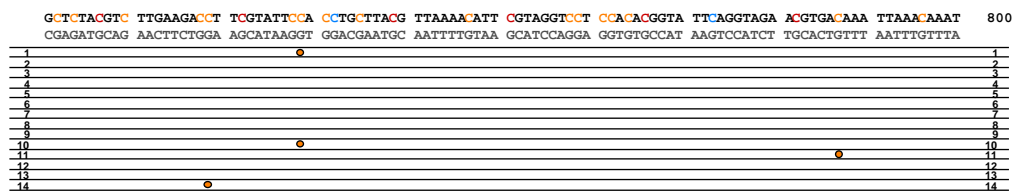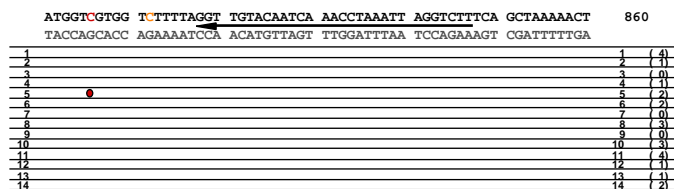

Average number of m<sup>5</sup>C: 1.7  
 Total number of m<sup>5</sup>C: 24

J. mat-1/mt- (CC1312), gametes, A strand

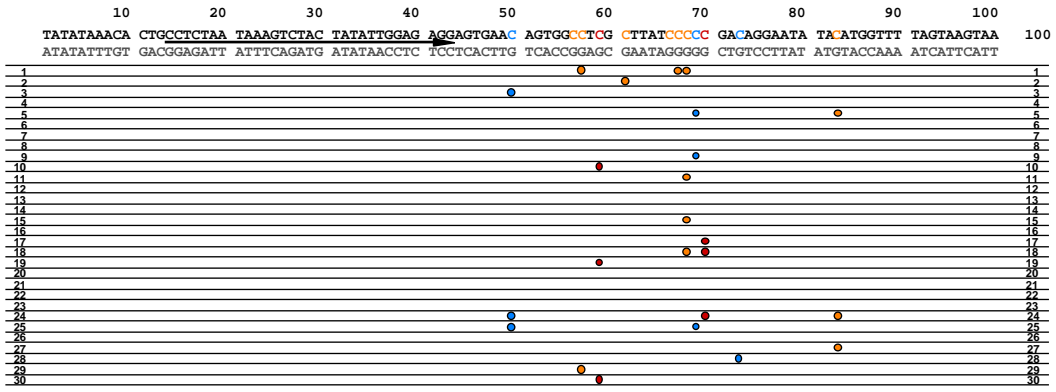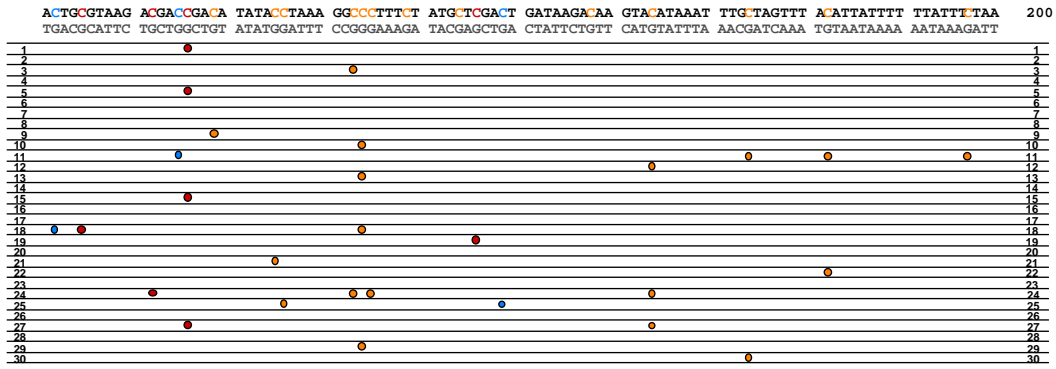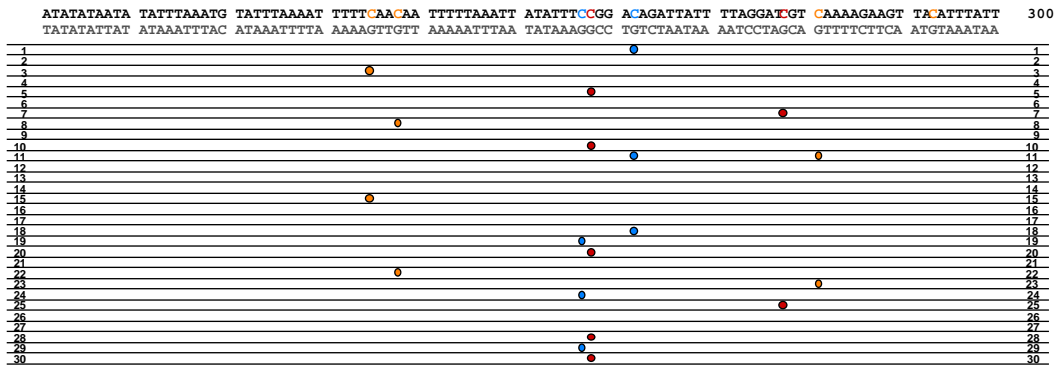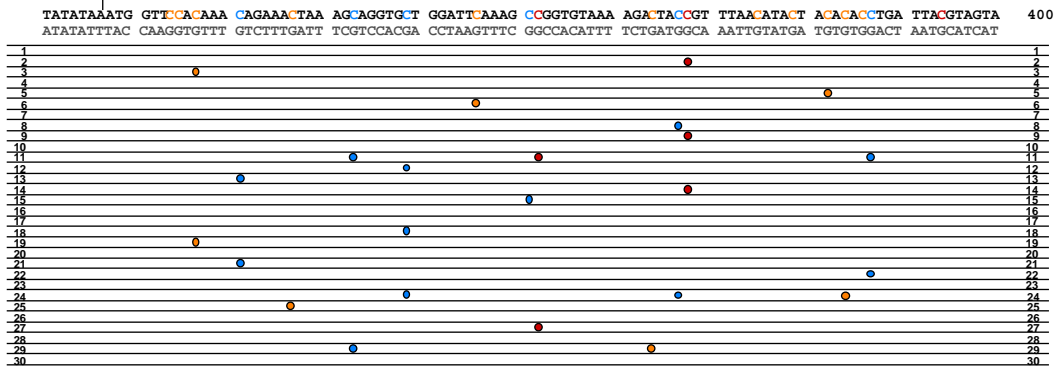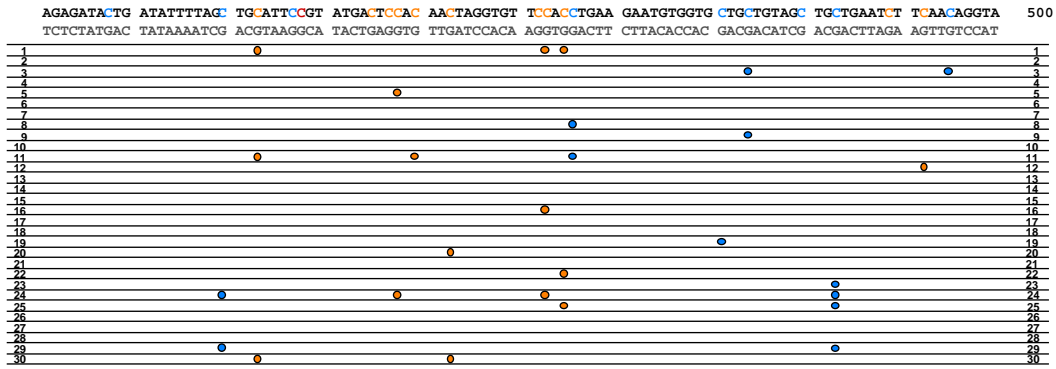

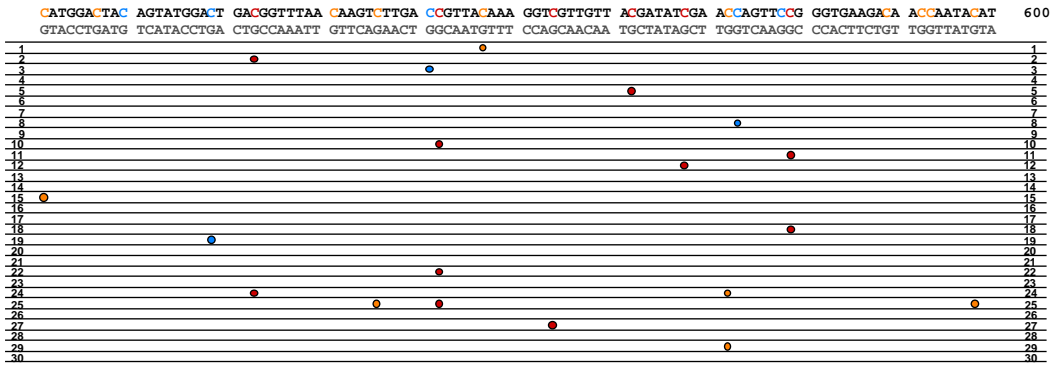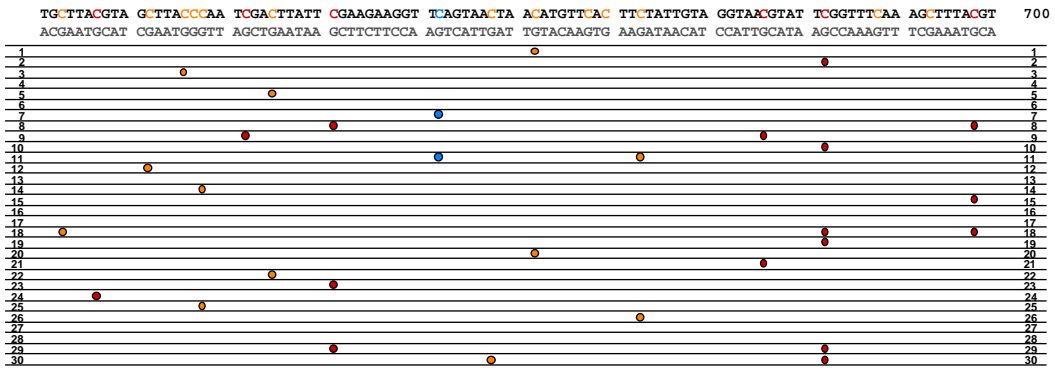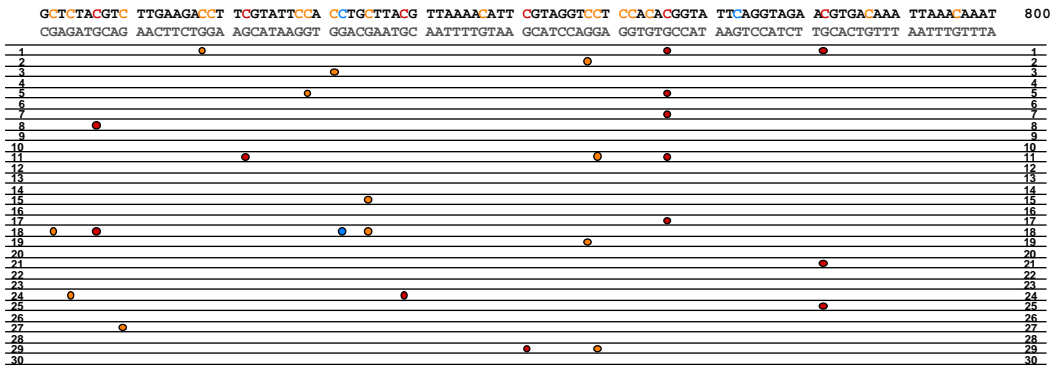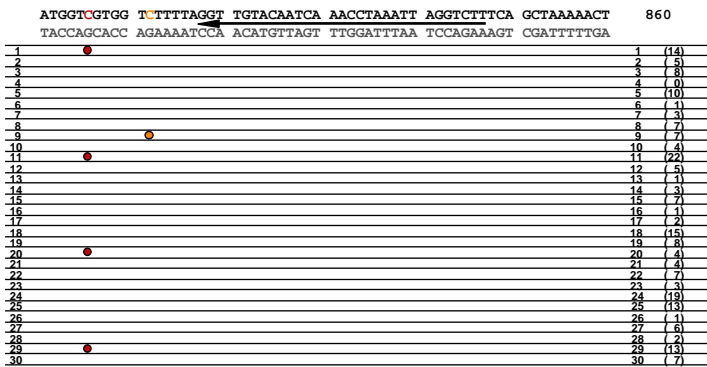

Average number of m<sup>5</sup>C: 6.7

m<sup>5</sup>C numbers  
 CpG : 68 (33.7 %)  
 CpNpG : 47 (23.3 %)  
 Others : 87 (43.0 %)  
 Total : 202

K. wt/mt+ (CC125), vegetative cells, B strand

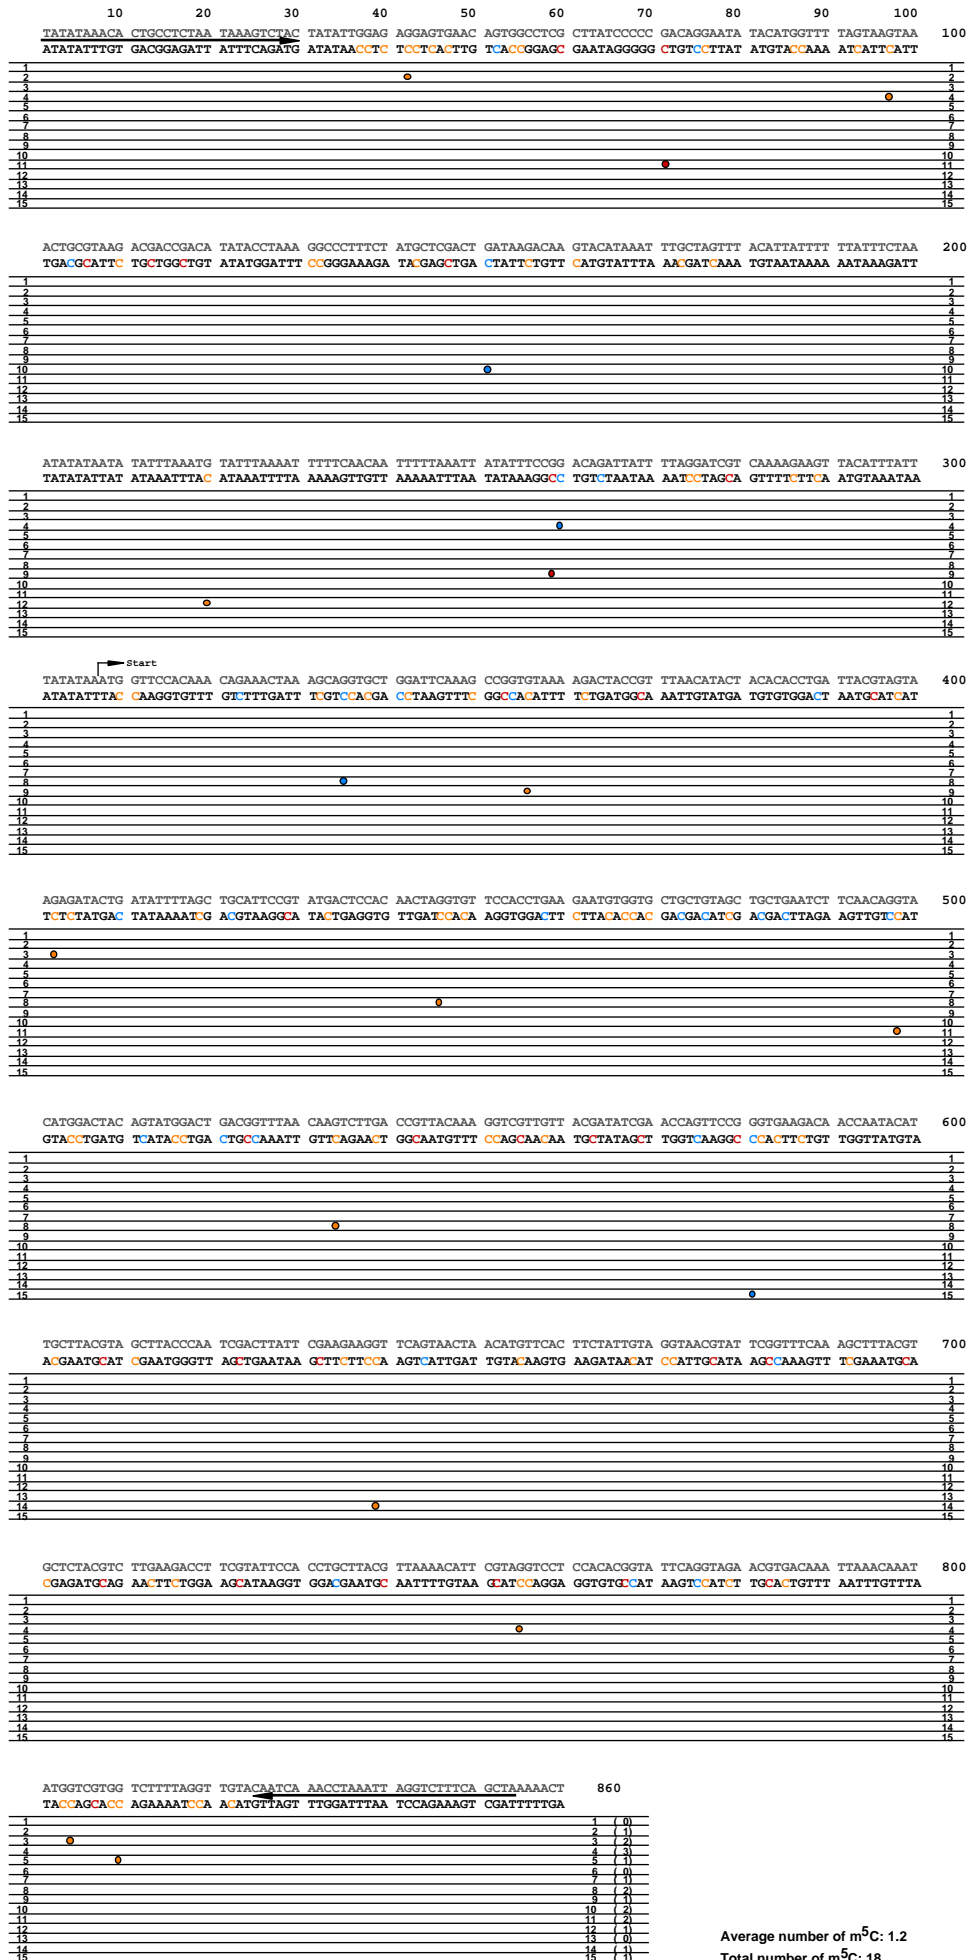

L. wt/mt+ (CC125), gametes, B strand

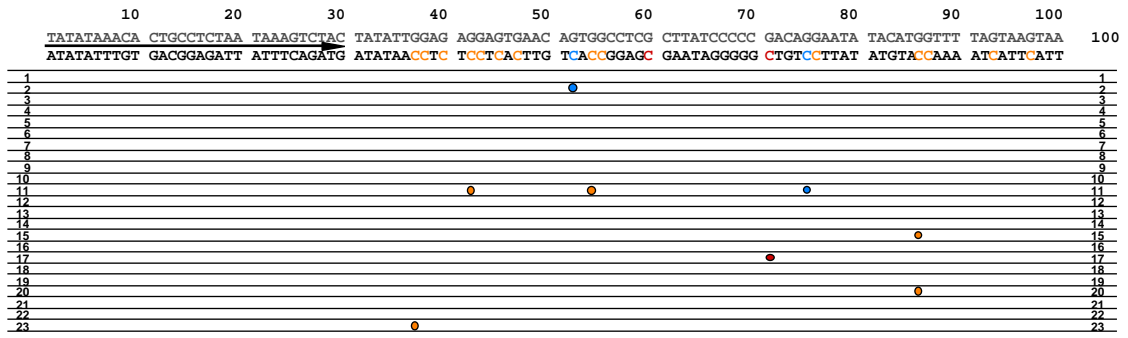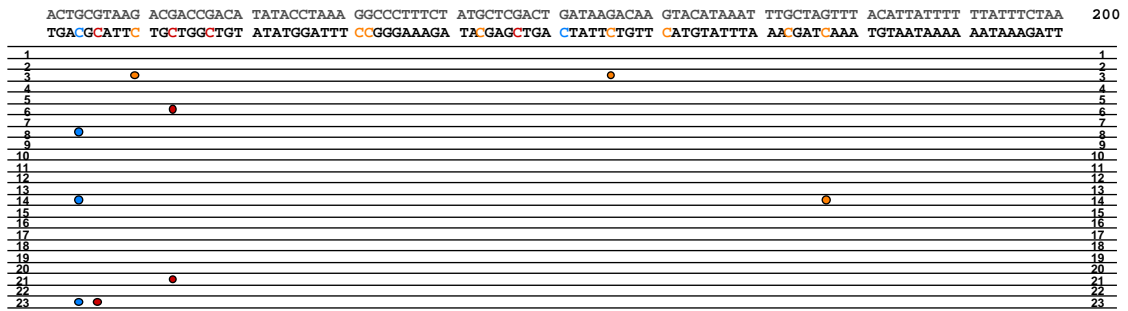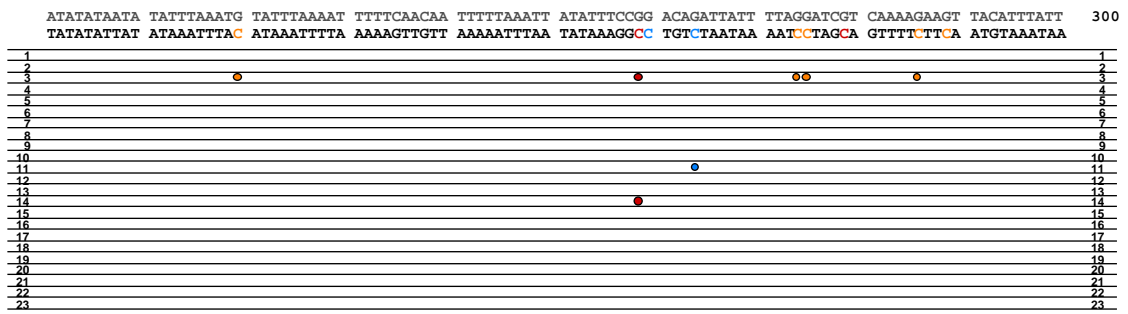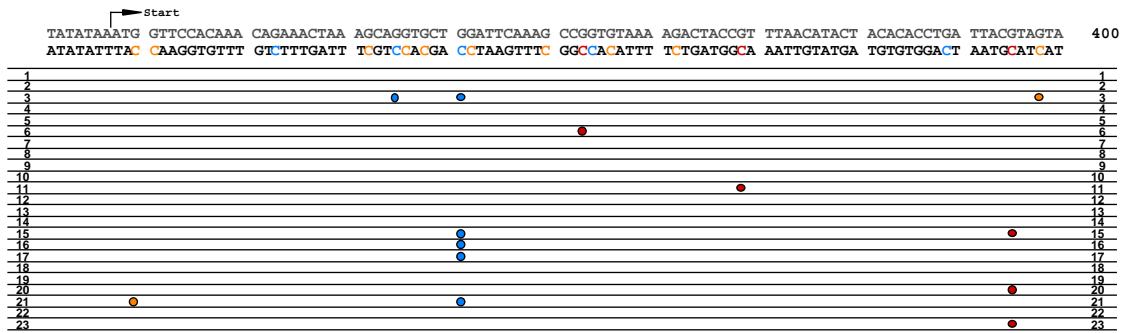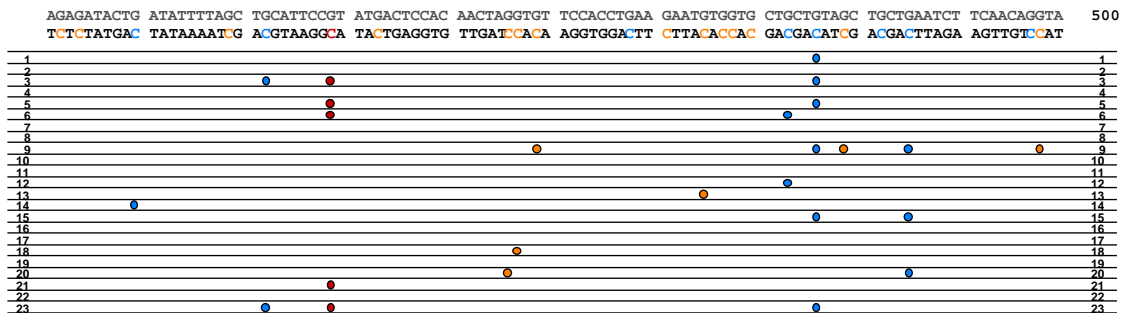

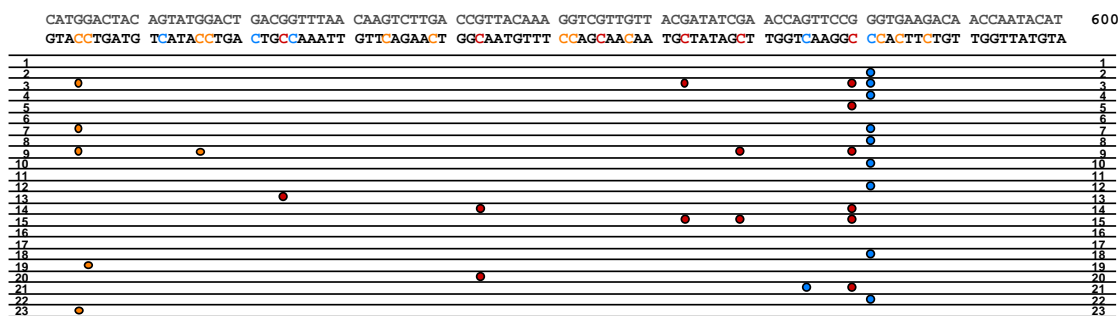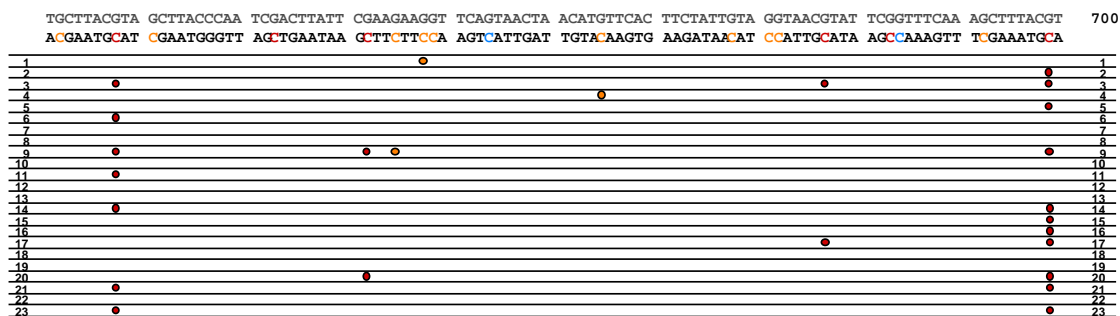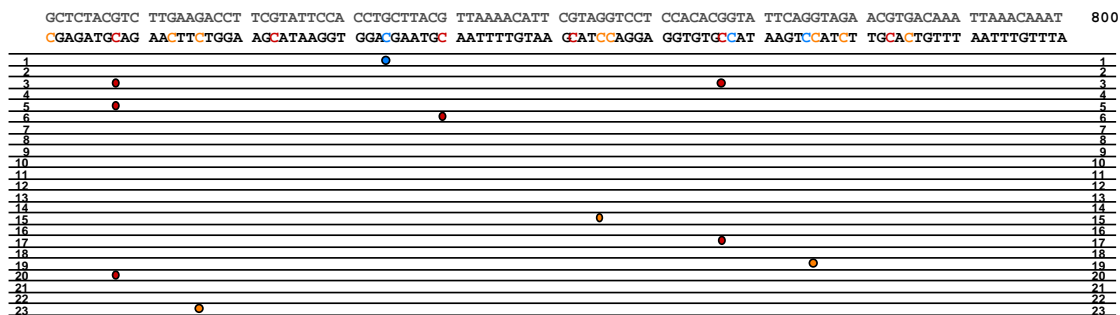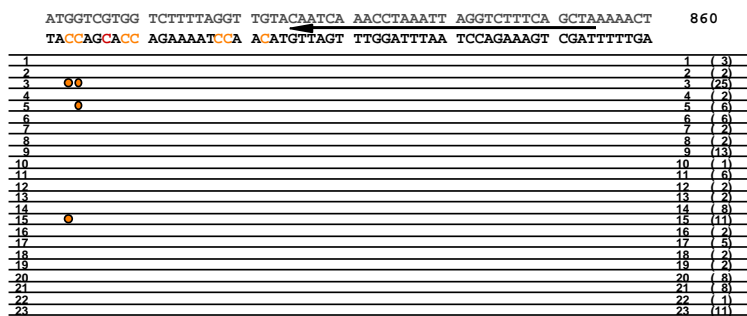

Average number of m<sup>5</sup>C: 5.7

m<sup>5</sup>C numbers  
 CpG : 57 (43.8 %)  
 CpNpG : 37 (28.5 %)  
 Others : 36 (27.7 %)  
 Total : 130



M. me-1/mt+ (CC1154), vegetative cells, B strand

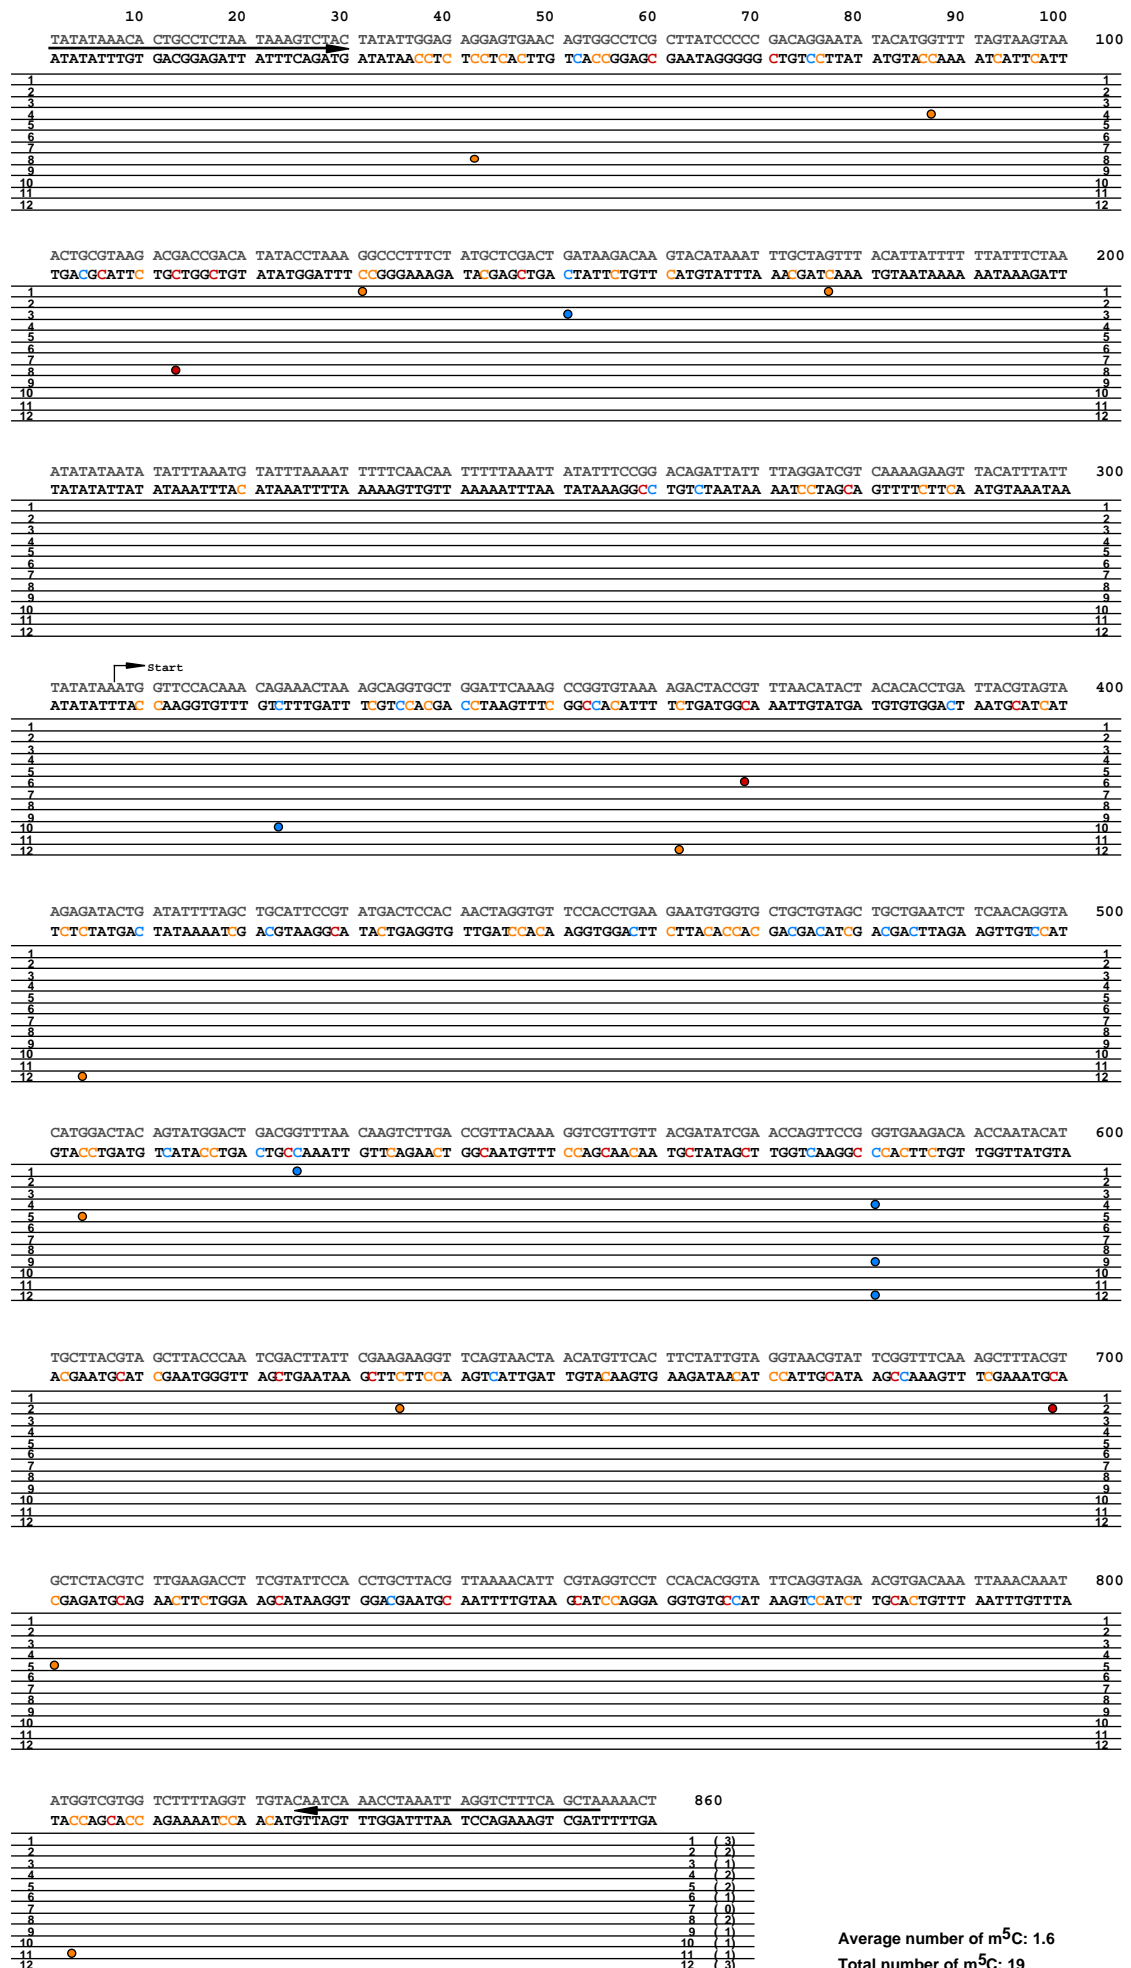

Average number of m<sup>5</sup>C: 1.6  
Total number of m<sup>5</sup>C: 19

N. me-1/mt+ (CC1154), gametes, B strand

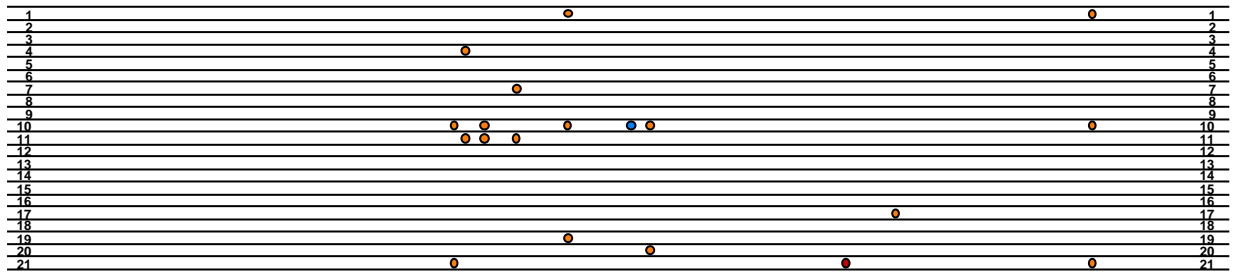

ACTGCGTAAG ACGACCGACA TATACCTAAA GGCCCTTTCT ATGCTCGACT GATAAGACAA GTACATAAAT TTGCTAGTTT ACATTATTTT TTATTTCTAA 200  
 TGACGCATTG TGCCTGGCTGT ATATGGATT CCGGAAAAGA TAGAGCTGA CTATTCTGTT CATGTATTTA AAGATCAAA TGTAATAAAA AATAAAGATT

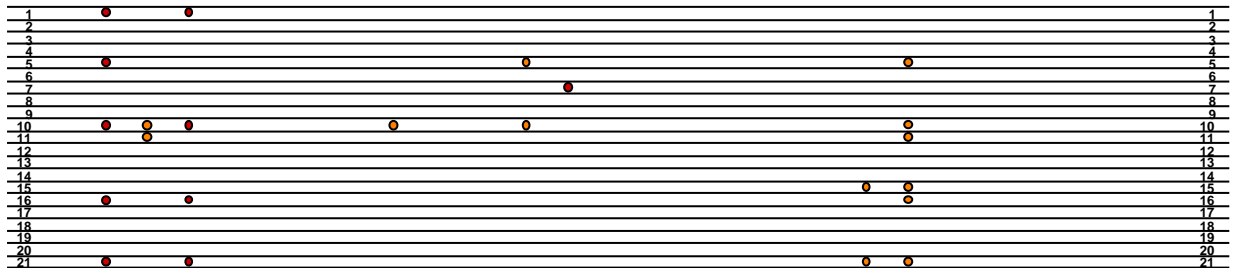

ATATATAATA TATTTAAATG TATTTAAAT TTTTCAACAA TTTTAAATT ATATTTCCGG ACAGATTATT TTAGGATCGT CAAAAGAAGT TACATTTATT 300  
 TATATATTAT ATAAATTTA ATAAATTTTA AAAAGTTGTT AAAAATTTAA TATAAAGGCC TGTCTAATAA AATCTAGCA GTTTTCTTCA ATGTAAATAA

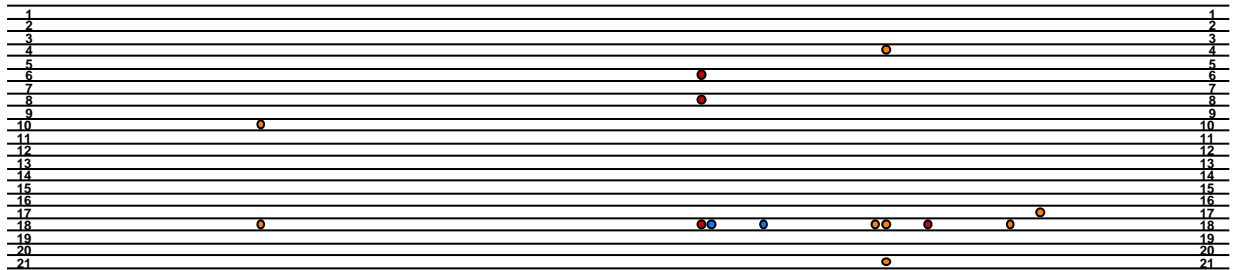

TATATAAATG GTTCCACAAA CAGAACTAA AGCAGGTGCT GGATTCAAAG CCGGTGTAAA AGACTACCGT TTAACATACT ACACACCTGA TTACGTAGTA 400  
 ATATATTTA CAAGGTGTT GTTTTGATT TGTCCACGA CTTAAGTTT GCCACATTT TCTGATGCA AATTGTATGA TGTGTGGACT AATGCATCAT

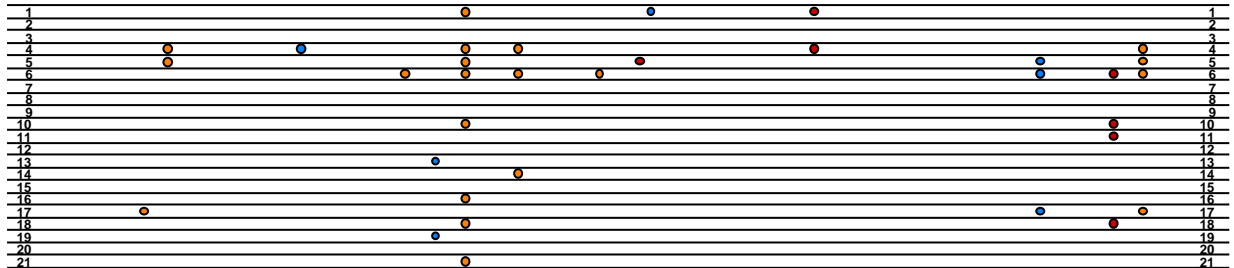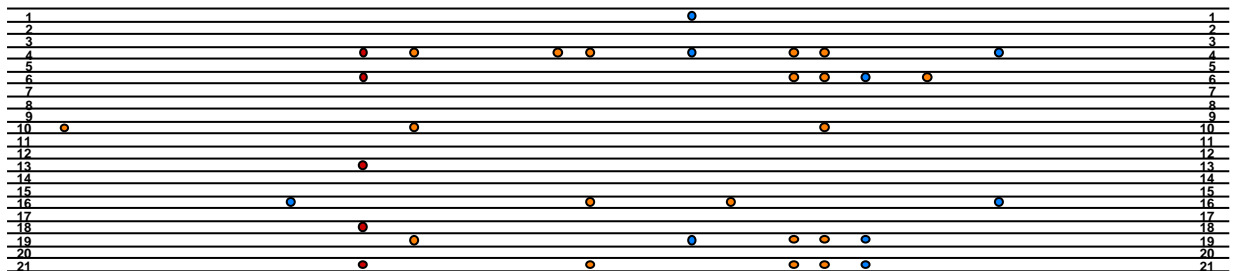

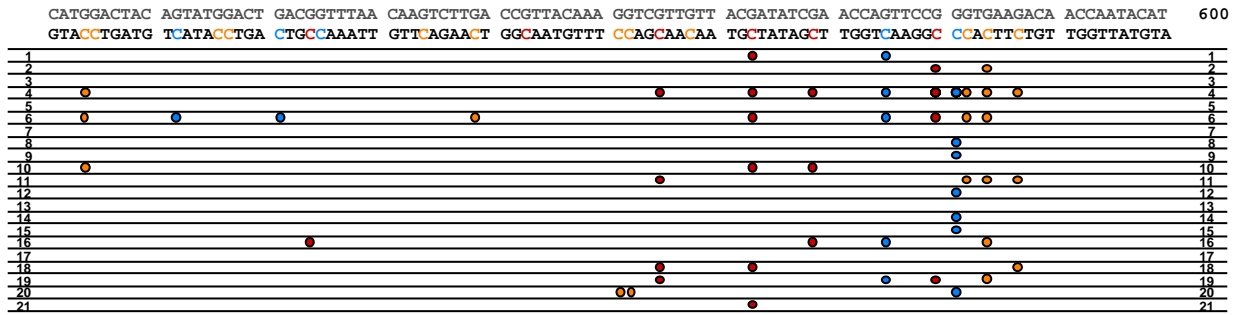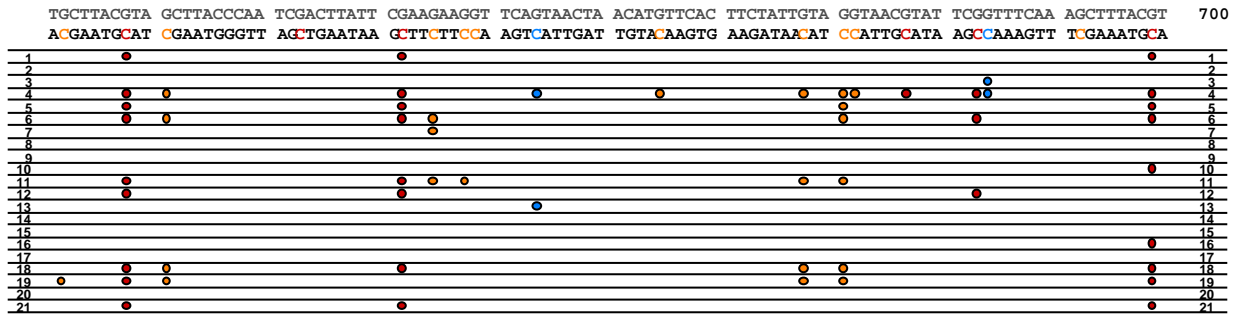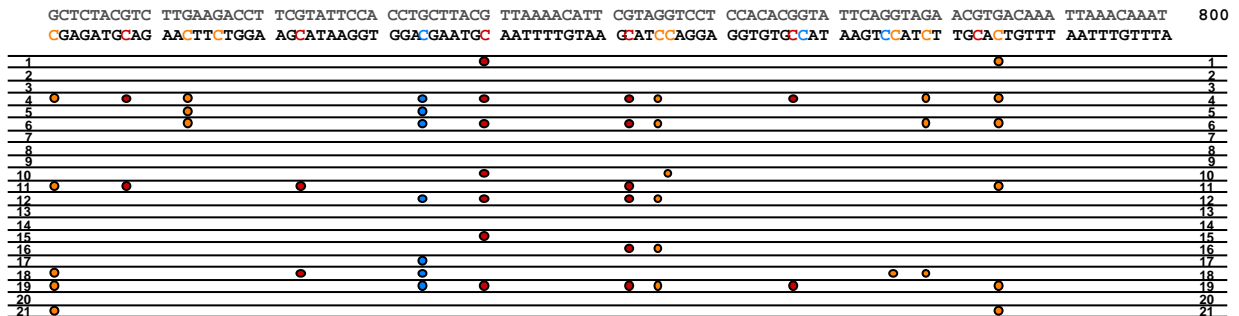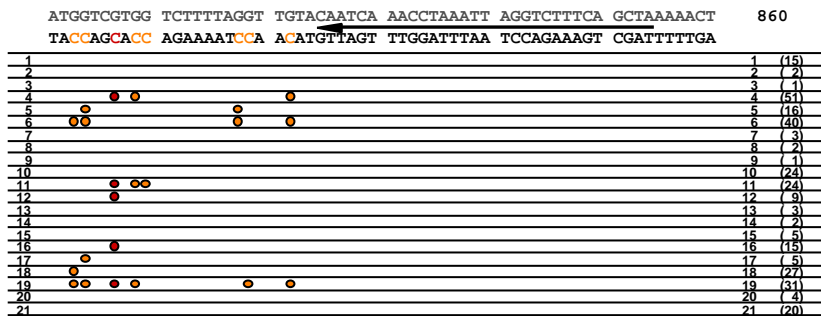

Average number of m<sup>5</sup>C: 14.3

m<sup>5</sup>C numbers  
 CpG : 99 (33.0 %)  
 CpNpG : 43 (14.3 %)  
 Others : 158 (52.7 %)  
 Total : 300
